# Supplementary material for: Broad activation of latent HIV-1 in vivo
Source: PubMed Central journal article supplement (PMC5025526; doi:10.1038/ncomms12731), 2016-09-08
Supplement: ncomms12731-s1.pdf [file ncomms12731-s1.pdf]

Supplementary figure 1

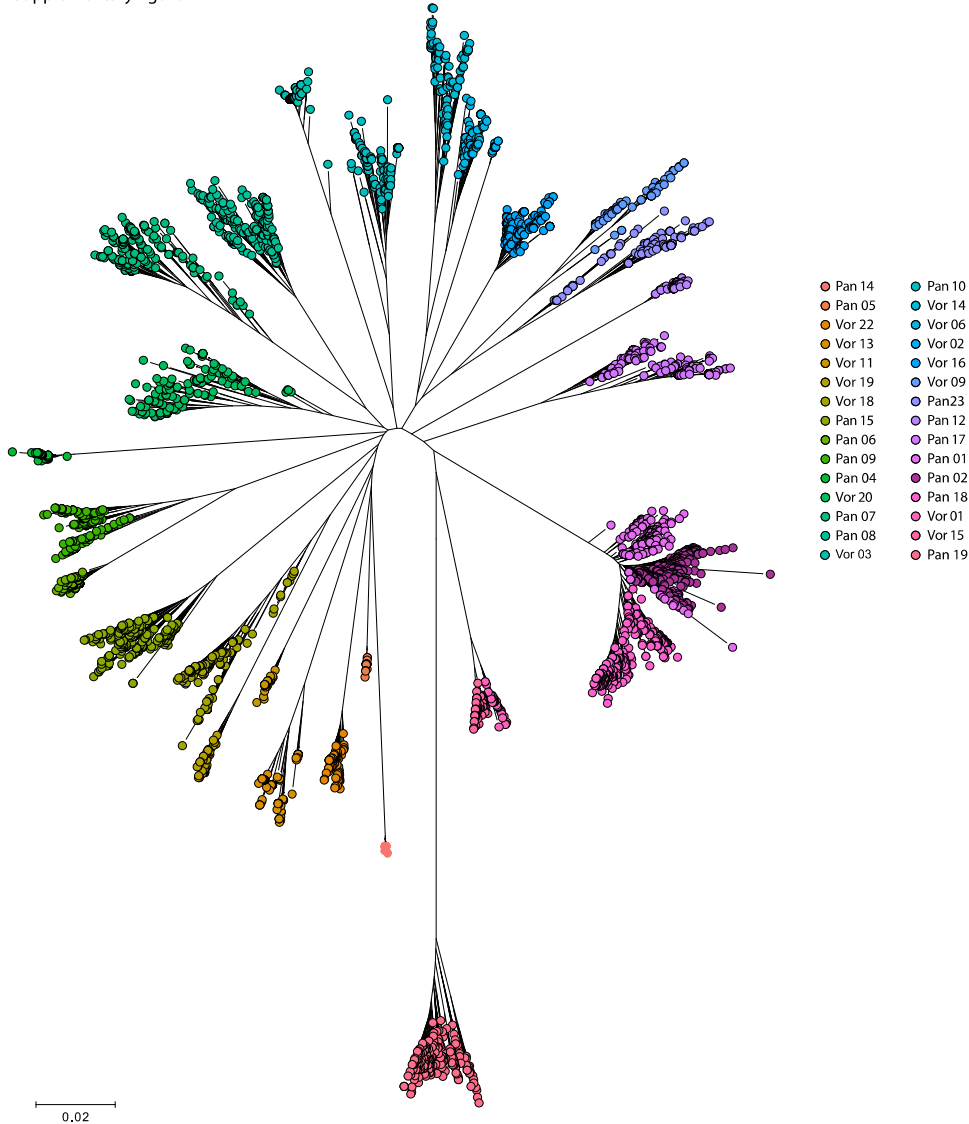

1

2

3 **Supplementary Figure 1** Sequences from individual study participants segregate  
4 independently A neighbor-joining tree of sequences from all participants in both the  
5 panobinostat and vorinostat trials is shown. Sequences that were classified as defective  
6 (containing stop codons or hypermutation) were not included. The phylogenetic analysis  
7 and tree construction were conducted using MEGA-CC.

8

Supplementary figure 2

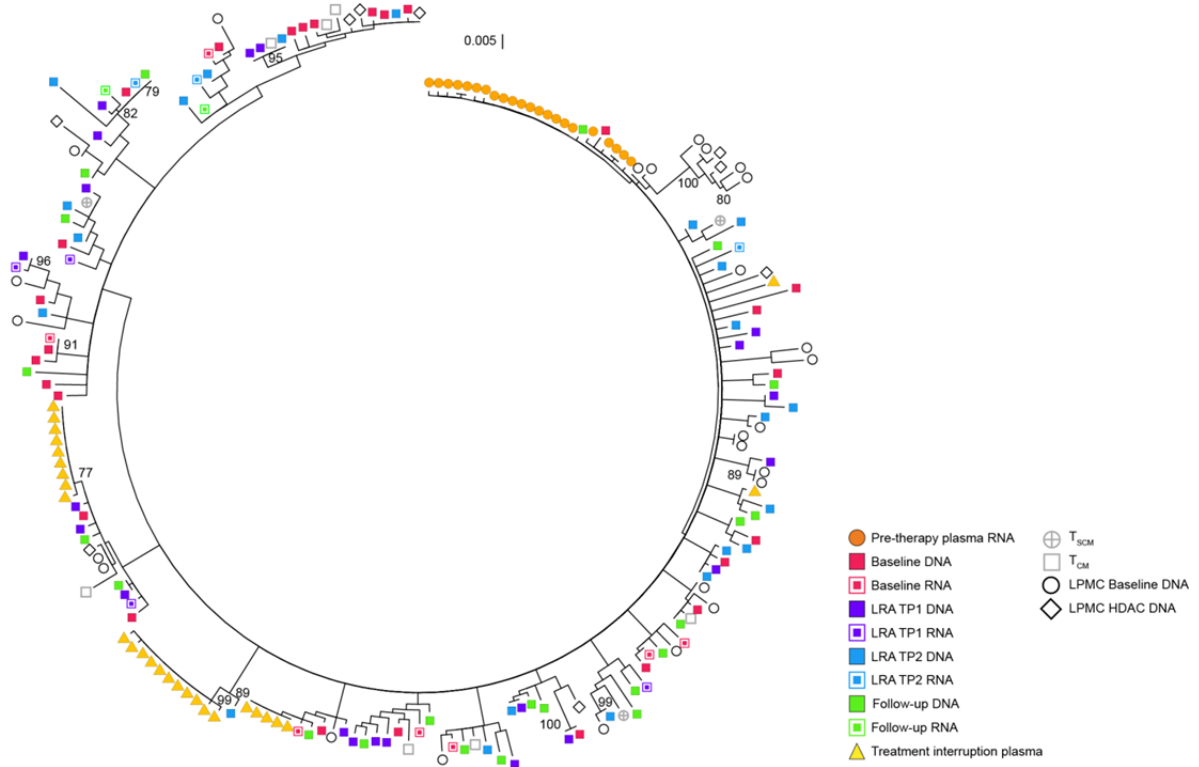

9

10

11 **Supplementary Figure 2** Panobinostat participant 1 phylogenetic tree. Maximum-  
12 likelihood tree of the V1-V3 region of HIV-1 *env* sequences obtained using single-  
13 genome sequencing on isolated CD4+ T cells for participant 1 from the panobinostat  
14 trial. The phylogenetic analysis and tree construction were conducted using MEGA-CC.  
15 Defective sequences (hypermutants or containing stop codons) were excluded from the  
16 phylogenetic tree analysis. The plasma samples were collected approximately 2 months  
17 prior to initiation of anti-retroviral therapy and 14 days following the analytical treatment  
18 interruption. Peripheral blood samples were collected at baseline, 28 days after the first  
19 dose of panobinostat (TP1), 32 days after the first dose of panobinostat (TP2), and 38  
20 days after the final panobinostat dose. Intestinal lamina propria mononuclear cells were  
21 collected at baseline (1 week prior to the first panobinostat dose) and during week 4 of  
22 the panobinostat trial. Cell subsets were sorted from peripheral blood samples collected  
23 38 days after the final panobinostat dose.

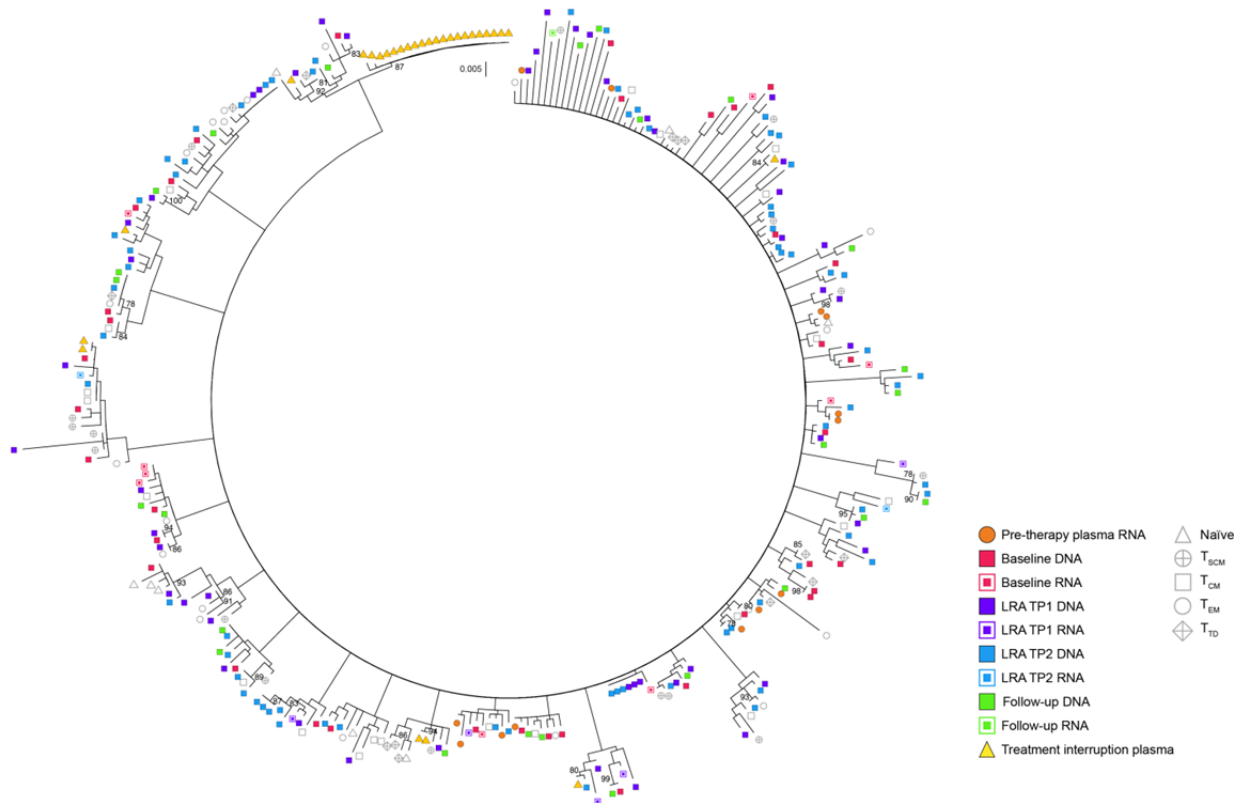

24

25 **Supplementary Figure 3** Panobinostat participant 2 phylogenetic tree. Maximum-  
 26 likelihood tree of the V1-V3 region of HIV-1 *env* sequences obtained using single-  
 27 genome sequencing on isolated CD4+ T cells for participant 2 from the panobinostat  
 28 trial. The phylogenetic analysis and tree construction were conducted using MEGA-CC.  
 29 Defective sequences (hypermutants or containing stop codons) were excluded from the  
 30 phylogenetic tree analysis. The plasma samples were collected approximately 1 year  
 31 and 5 months prior to initiation of anti-retroviral therapy and 14 days following the  
 32 analytical treatment interruption. Peripheral blood samples were collected at baseline, 2  
 33 hours after the first dose of panobinostat (TP1), 14 days and 42 days after the first dose  
 34 of panobinostat (sequences from these two time points are both labeled as TP2), and  
 35 38 days after the final panobinostat dose. Cell subsets were sorted from peripheral  
 36 blood samples collected 38 days after the final panobinostat dose.

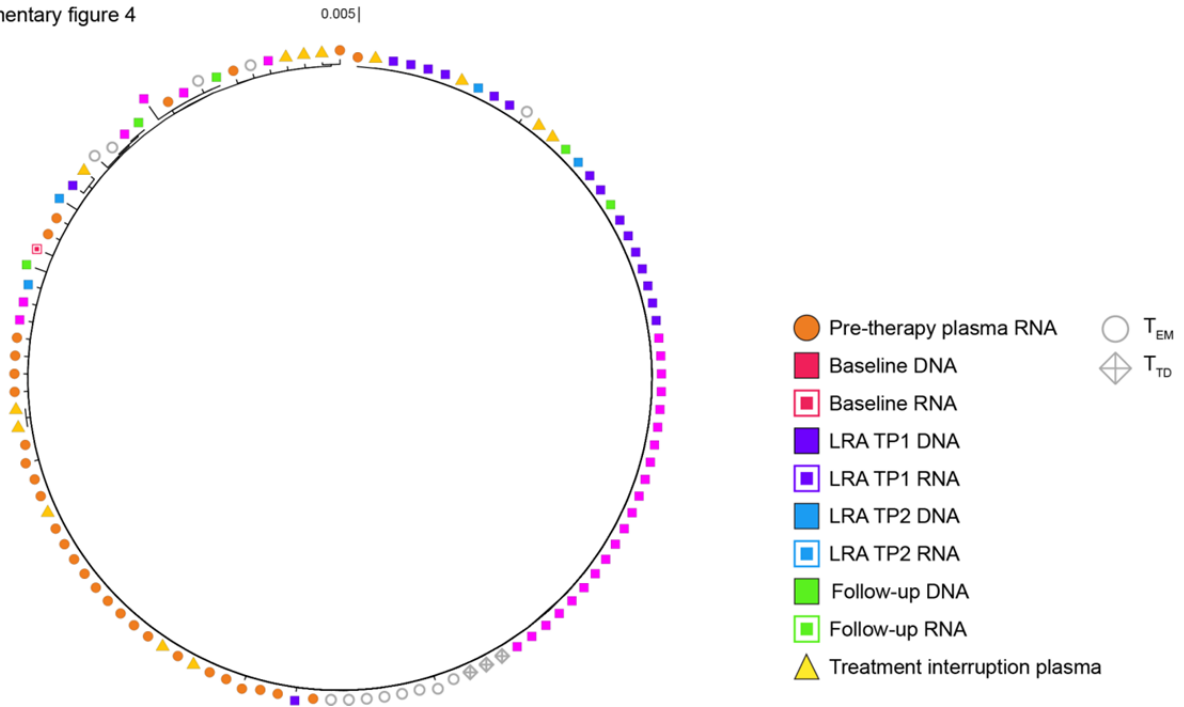

37

38 **Supplementary Figure 4** Panobinostat participant 4 phylogenetic tree. Maximum-  
 39 likelihood tree of the V1-V3 region of HIV-1 *env* sequences obtained using single-  
 40 genome sequencing on isolated CD4+ T cells for participant 4 from the panobinostat  
 41 trial. The phylogenetic analysis and tree construction were conducted using MEGA-CC.  
 42 Defective sequences (hypermutants or containing stop codons) were excluded from the  
 43 phylogenetic tree analysis. The plasma samples were collected the day of anti-retroviral  
 44 therapy initiation and 46 and 55 days following the analytical treatment interruption.  
 45 Peripheral blood samples were collected at baseline, 1 day after the first dose of  
 46 panobinostat (TP1), 28 days after the first dose of panobinostat (TP2), and 38 days  
 47 after the final panobinostat dose. Cell subsets were sorted from peripheral blood  
 48 samples collected 38 days after the final panobinostat dose.

## Supplementary figure 5

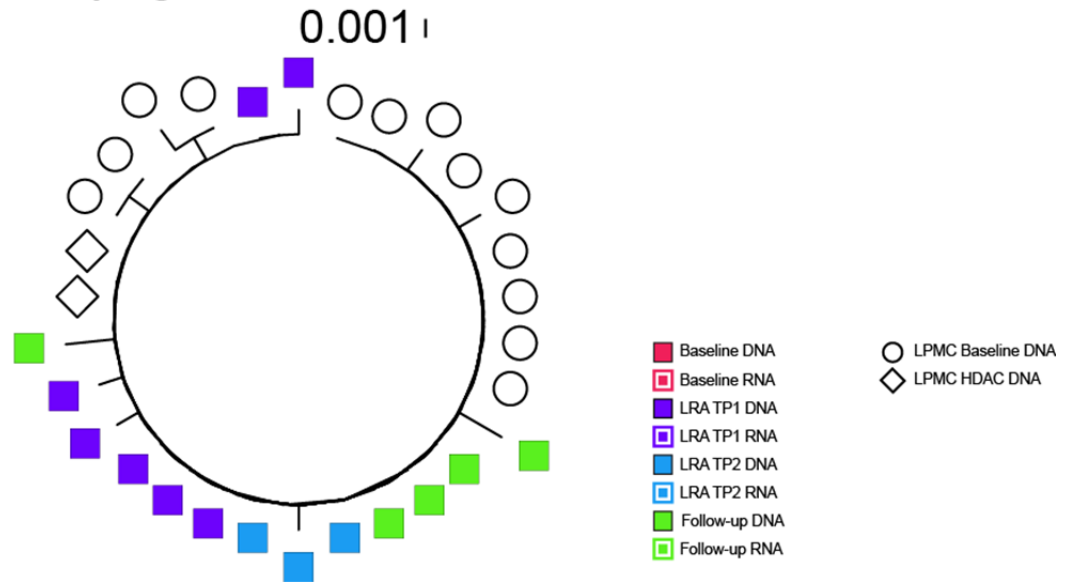

49

50 **Supplementary Figure 5** Panobinostat participant 5 phylogenetic tree. Maximum-  
51 likelihood tree of the V1-V3 region of HIV-1 *env* sequences obtained using single-  
52 genome sequencing on isolated CD4+ T cells for participant 5 from the panobinostat  
53 trial. The phylogenetic analysis and tree construction were conducted using MEGA-CC.  
54 Defective sequences (hypermutants or containing stop codons) were excluded from the  
55 phylogenetic tree analysis. Peripheral blood samples were collected at baseline, 2  
56 hours after the first dose of panobinostat (TP1), 28 days after the first dose of  
57 panobinostat (TP2), and 38 days after the final panobinostat dose. Intestinal lamina  
58 propria mononuclear cells were collected at baseline (1 week prior to the first  
59 panobinostat dose) and during week 4 of the panobinostat trial.

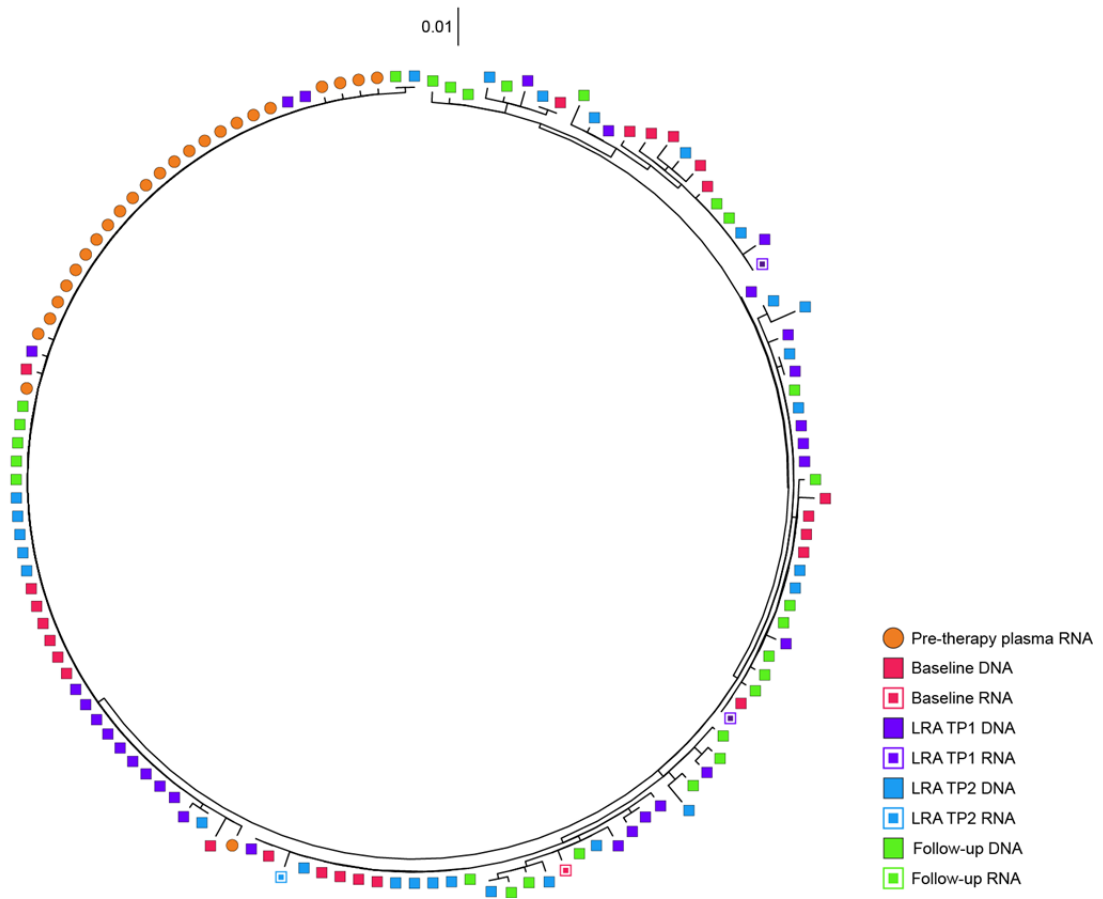

60

61 **Supplementary Figure 6** Panobinostat participant 6 phylogenetic tree. Maximum-  
 62 likelihood tree of the V1-V3 region of HIV-1 *env* sequences obtained using single-  
 63 genome sequencing on isolated CD4+ T cells for participant 6 from the panobinostat  
 64 trial. The phylogenetic analysis and tree construction were conducted using MEGA-CC.  
 65 Defective sequences (hypermutants or containing stop codons) were excluded from the  
 66 phylogenetic tree analysis. The plasma sample was collected approximately 8 months  
 67 prior to initiation of anti-retroviral therapy. Peripheral blood samples were collected at  
 68 baseline, 2 hours after the first dose of panobinostat (TP1), 1 day after the first dose of  
 69 panobinostat (TP2), and 38 days after the final panobinostat dose.

Supplementary figure 7

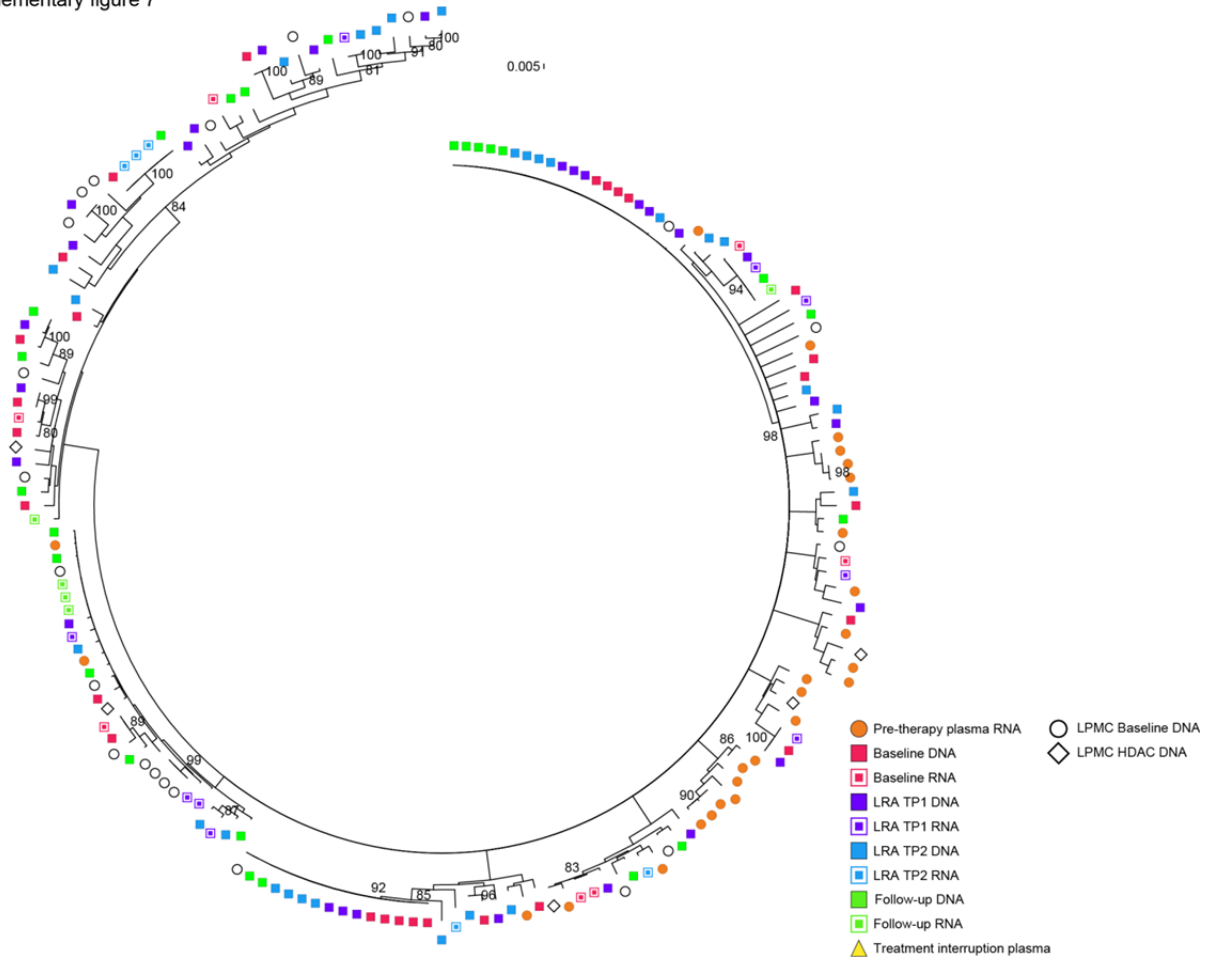

70

71 **Supplementary Figure 7** Panobinostat participant 7 phylogenetic tree. Maximum-  
72 likelihood tree of the V1-V3 region of HIV-1 *env* sequences obtained using single-  
73 genome sequencing on isolated CD4+ T cells for participant 7 from the panobinostat  
74 trial. The phylogenetic analysis and tree construction were conducted using MEGA-CC.  
75 Defective sequences (hypermutants or containing stop codons) were excluded from the  
76 phylogenetic tree analysis. The plasma sample was collected approximately 1 year prior  
77 to initiation of anti-retroviral therapy. Peripheral blood samples were collected at  
78 baseline, 2 hours after the first dose of panobinostat (TP1), 28 days after the first dose  
79 of panobinostat (TP2), and 38 days after the final panobinostat dose. Intestinal lamina  
80 propria mononuclear cells were collected at baseline (1 week prior to the first  
81 panobinostat dose) and during week 4 of the panobinostat trial.

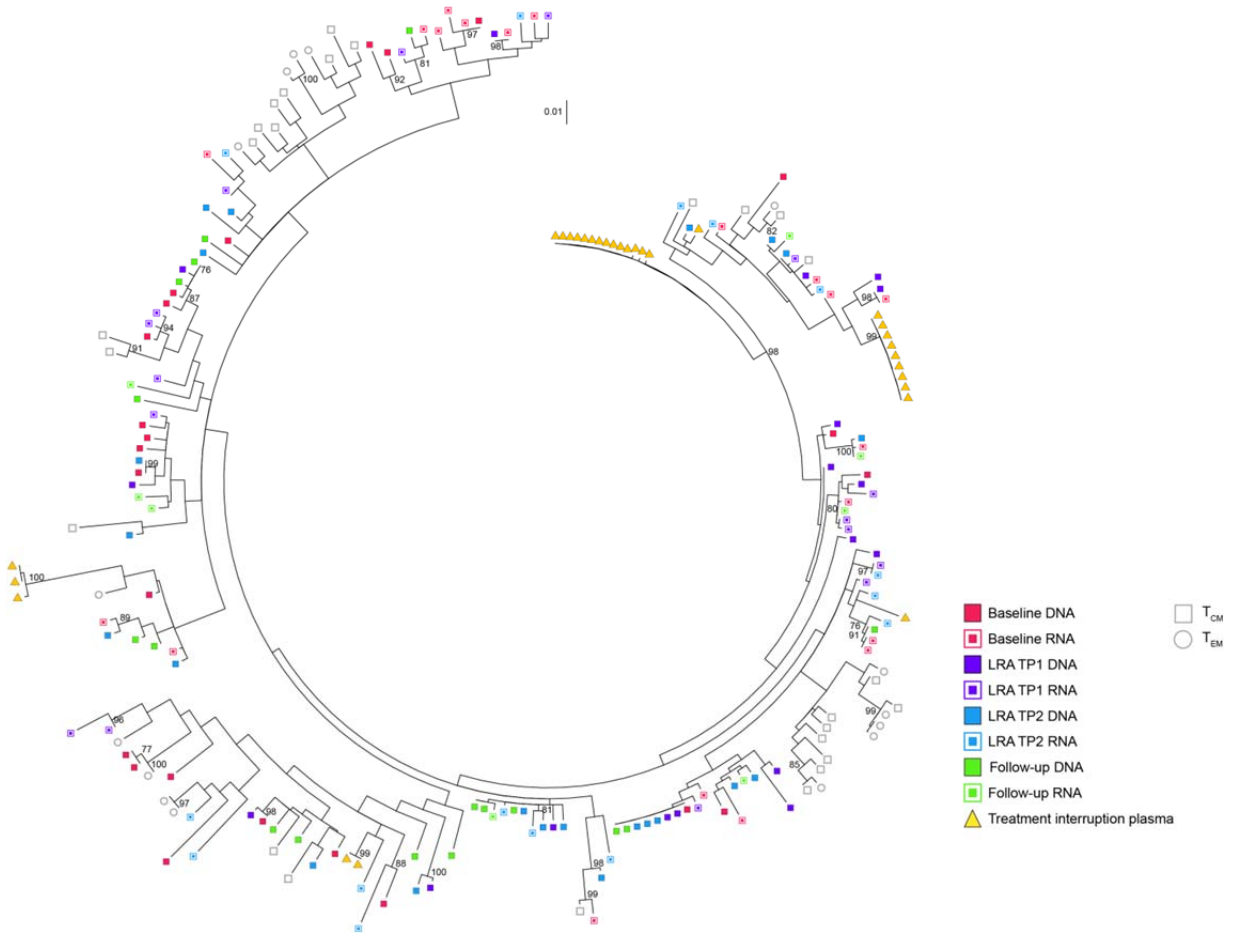

82

83 **Supplementary Figure 8** Panobinostat participant 8 phylogenetic tree. Maximum-  
 84 likelihood tree of the V1-V3 region of HIV-1 *env* sequences obtained using single-  
 85 genome sequencing on isolated CD4+ T cells for participant 8 from the panobinostat  
 86 trial. The phylogenetic analysis and tree construction were conducted using MEGA-CC.  
 87 Defective sequences (hypermutants or containing stop codons) were excluded from the  
 88 phylogenetic tree analysis. The plasma sample was collected 14 days following the  
 89 analytical treatment interruption. Peripheral blood samples were collected at baseline, 2  
 90 hours after the first dose of panobinostat (TP1), 32 days after the first dose of  
 91 panobinostat (TP2), and 38 days after the final panobinostat dose. Cell subsets were  
 92 sorted from peripheral blood samples collected 38 days after the final panobinostat  
 93 dose.



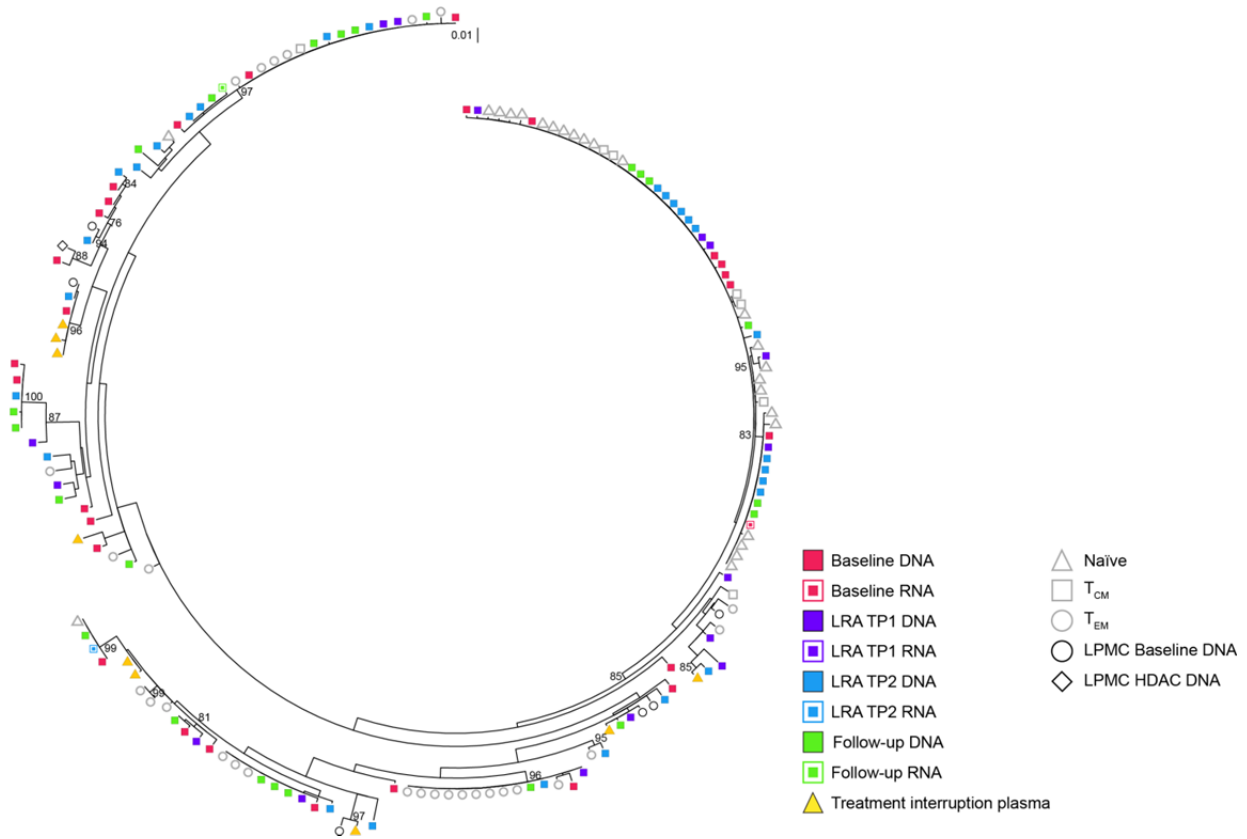

94

95 **Supplementary Figure 9** Panobinostat participant 9 phylogenetic tree. Maximum-  
 96 likelihood tree of the V1-V3 region of HIV-1 *env* sequences obtained using single-  
 97 genome sequencing on isolated CD4+ T cells for participant 9 from the panobinostat  
 98 trial. The phylogenetic analysis and tree construction were conducted using MEGA-CC.  
 99 Defective sequences (hypermutants or containing stop codons) were excluded from the  
 100 phylogenetic tree analysis. The plasma sample was collected 24 days following the  
 101 analytical treatment interruption. Peripheral blood samples were collected at baseline,  
 102 14 days after the first dose of panobinostat (TP1), 28 days after the first dose of  
 103 panobinostat (TP2), and 38 days after the final panobinostat dose. Intestinal lamina  
 104 propria mononuclear cells were collected at baseline (1 week prior to the first  
 105 panobinostat dose) and during week 4 of the panobinostat trial. Cell subsets were  
 106 sorted from peripheral blood samples collected 38 days after the final panobinostat  
 107 dose.

Supplementary figure 10

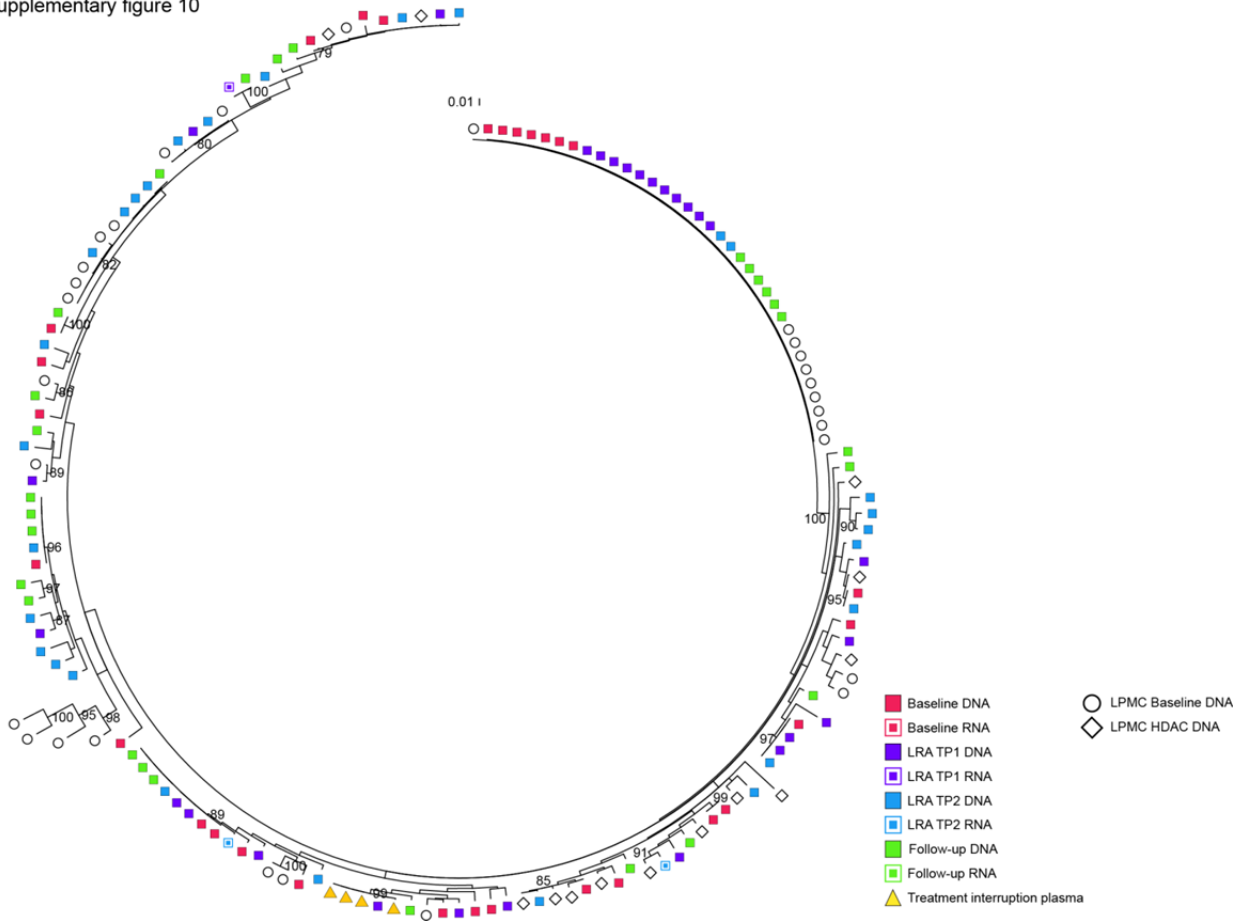

108

109 **Supplementary Figure 10** Panobinostat participant 10 phylogenetic tree. Maximum-  
110 likelihood tree of the V1-V3 region of HIV-1 *env* sequences obtained using single-  
111 genome sequencing on isolated CD4+ T cells for participant 10 from the panobinostat  
112 trial. The phylogenetic analysis and tree construction were conducted using MEGA-CC.  
113 Defective sequences (hypermutants or containing stop codons) were excluded from the  
114 phylogenetic tree analysis. The plasma sample was collected 145 days following the  
115 analytical treatment interruption. Peripheral blood samples were collected at baseline, 1  
116 day after the first dose of panobinostat (TP1), 28 days after the first dose of  
117 panobinostat (TP2), and 38 days after the final panobinostat dose. Intestinal lamina  
118 propria mononuclear cells were collected at baseline (1 week prior to the first  
119 panobinostat dose) and during week 4 of the panobinostat trial.

Supplementary figure 11

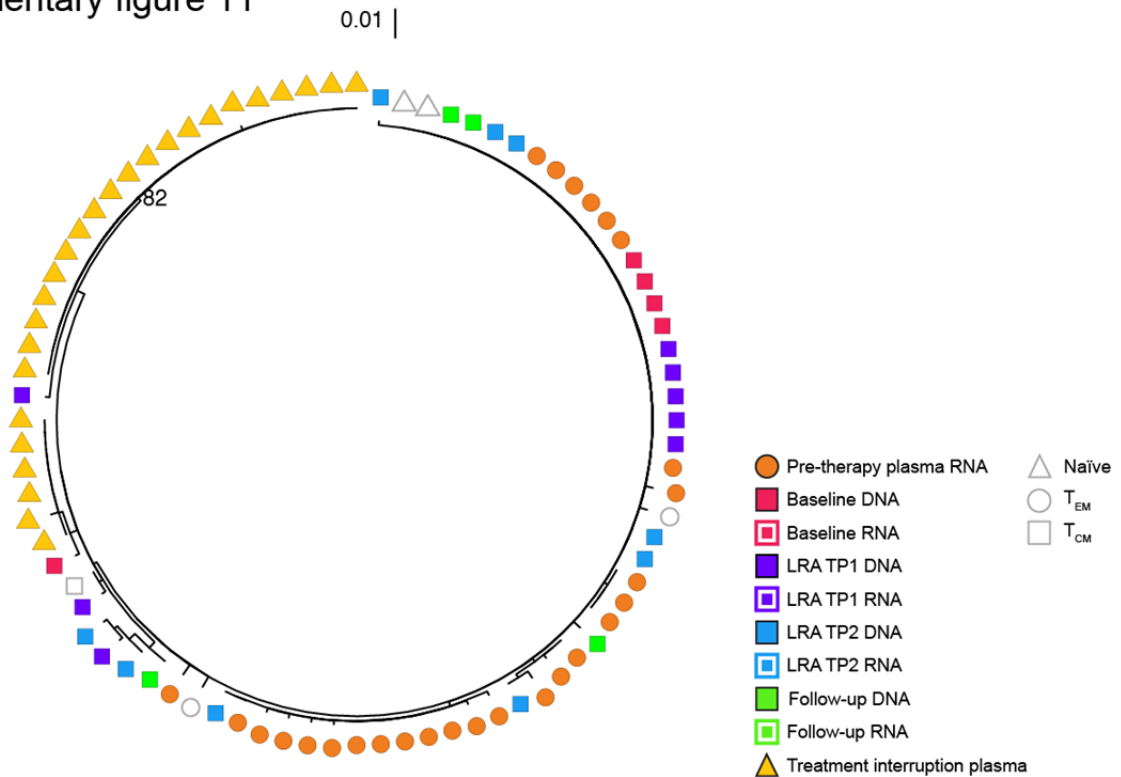

120

121 **Supplementary Figure 11** Panobinostat participant 12 phylogenetic tree. Maximum-  
 122 likelihood tree of the V1-V3 region of HIV-1 *env* sequences obtained using single-  
 123 genome sequencing on isolated CD4+ T cells for participant 12 from the panobinostat  
 124 trial. The phylogenetic analysis and tree construction were conducted using MEGA-CC.  
 125 Defective sequences (hypermutants or containing stop codons) were excluded from the  
 126 phylogenetic tree analysis. The plasma samples were collected approximately 1 year  
 127 and 2 months prior to initiation of anti-retroviral therapy and 17 days following the  
 128 analytical treatment interruption. Peripheral blood samples were collected at baseline,  
 129 28 days after the first dose of panobinostat (TP1), 46 days after the first dose of  
 130 panobinostat (TP2), and 38 days after the final panobinostat dose. Cell subsets were  
 131 sorted from peripheral blood samples collected 38 days after the final panobinostat  
 132 dose.

Supplementary figure 12

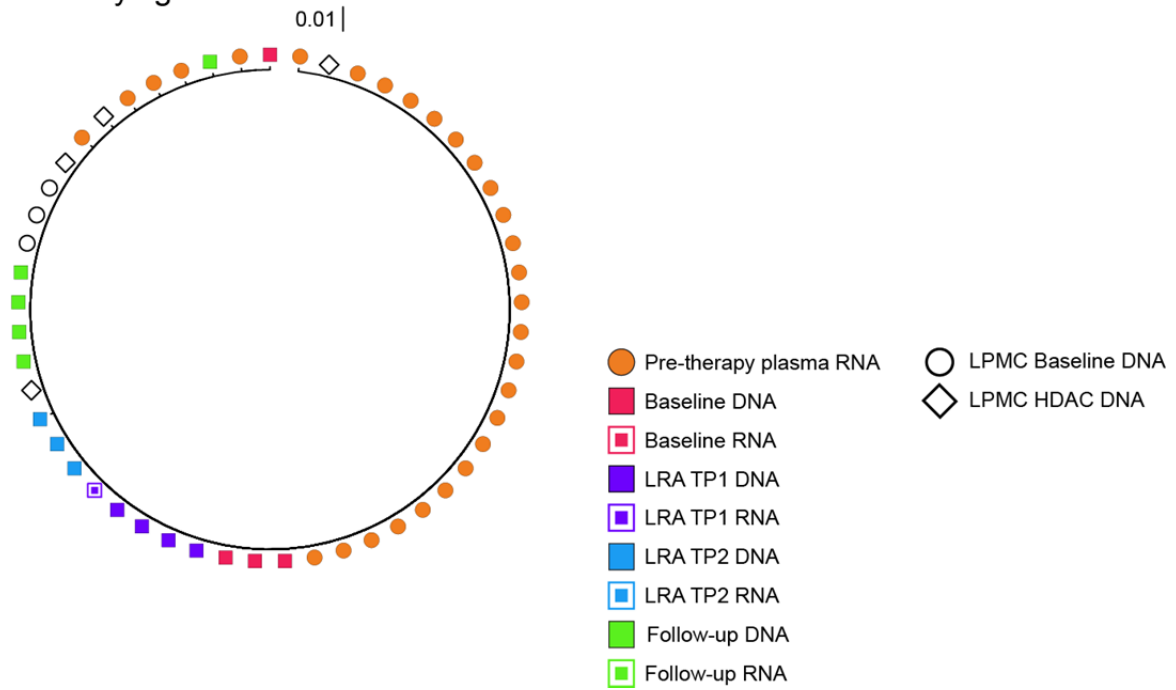

133

134 **Supplementary Figure 12** Panobinostat participant 14 phylogenetic tree. Maximum-  
135 likelihood tree of the V1-V3 region of HIV-1 *env* sequences obtained using single-  
136 genome sequencing on isolated CD4+ T cells for participant 14 from the panobinostat  
137 trial. The phylogenetic analysis and tree construction were conducted using MEGA-CC.  
138 Defective sequences (hypermutants or containing stop codons) were excluded from the  
139 phylogenetic tree analysis. The plasma samples was collected 2 days prior to initiation  
140 of anti-retroviral therapy. Peripheral blood samples were collected at baseline, 9 days  
141 after the first dose of panobinostat (TP1), 18 days after the first dose of panobinostat  
142 (TP2), and 38 days after the final panobinostat dose. Intestinal lamina propria  
143 mononuclear cells were collected at baseline (1 week prior to the first panobinostat  
144 dose) and during week 4 of the panobinostat trial.

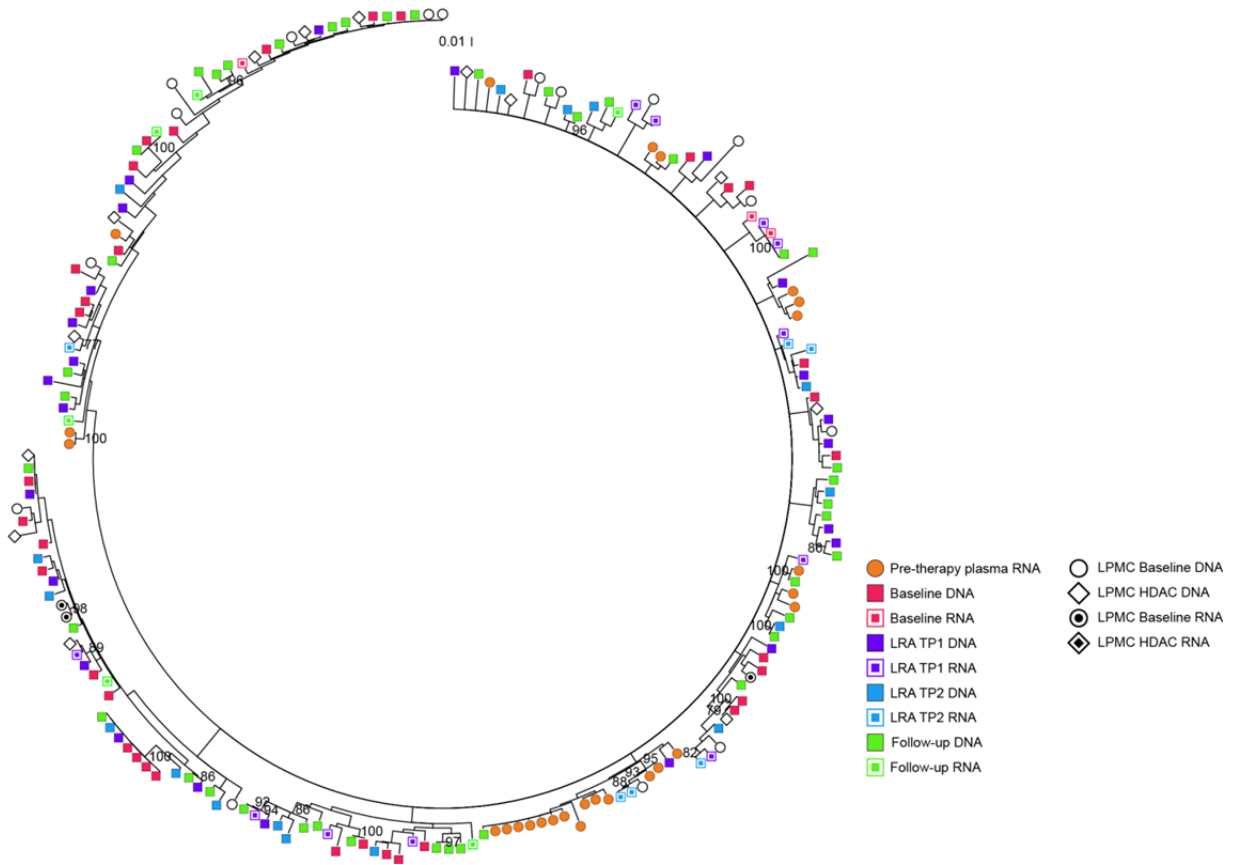

145

146 **Supplementary Figure 13** Panobinostat participant 15 phylogenetic tree. Maximum-  
 147 likelihood tree of the V1-V3 region of HIV-1 *env* sequences obtained using single-  
 148 genome sequencing on isolated CD4+ T cells for participant 15 from the panobinostat  
 149 trial. The phylogenetic analysis and tree construction were conducted using MEGA-CC.  
 150 Defective sequences (hypermutants or containing stop codons) were excluded from the  
 151 phylogenetic tree analysis. The plasma sample was collected approximately 2 years  
 152 and 1 month prior to initiation of anti-retroviral therapy. Peripheral blood samples were  
 153 collected at baseline, 32 days after the first dose of panobinostat (TP1), 46 days after  
 154 the first dose of panobinostat (TP2), and 38 days after the final panobinostat dose.  
 155 Intestinal lamina propria mononuclear cells were collected at baseline (1 week prior to  
 156 the first panobinostat dose) and during week 4 of the panobinostat trial.

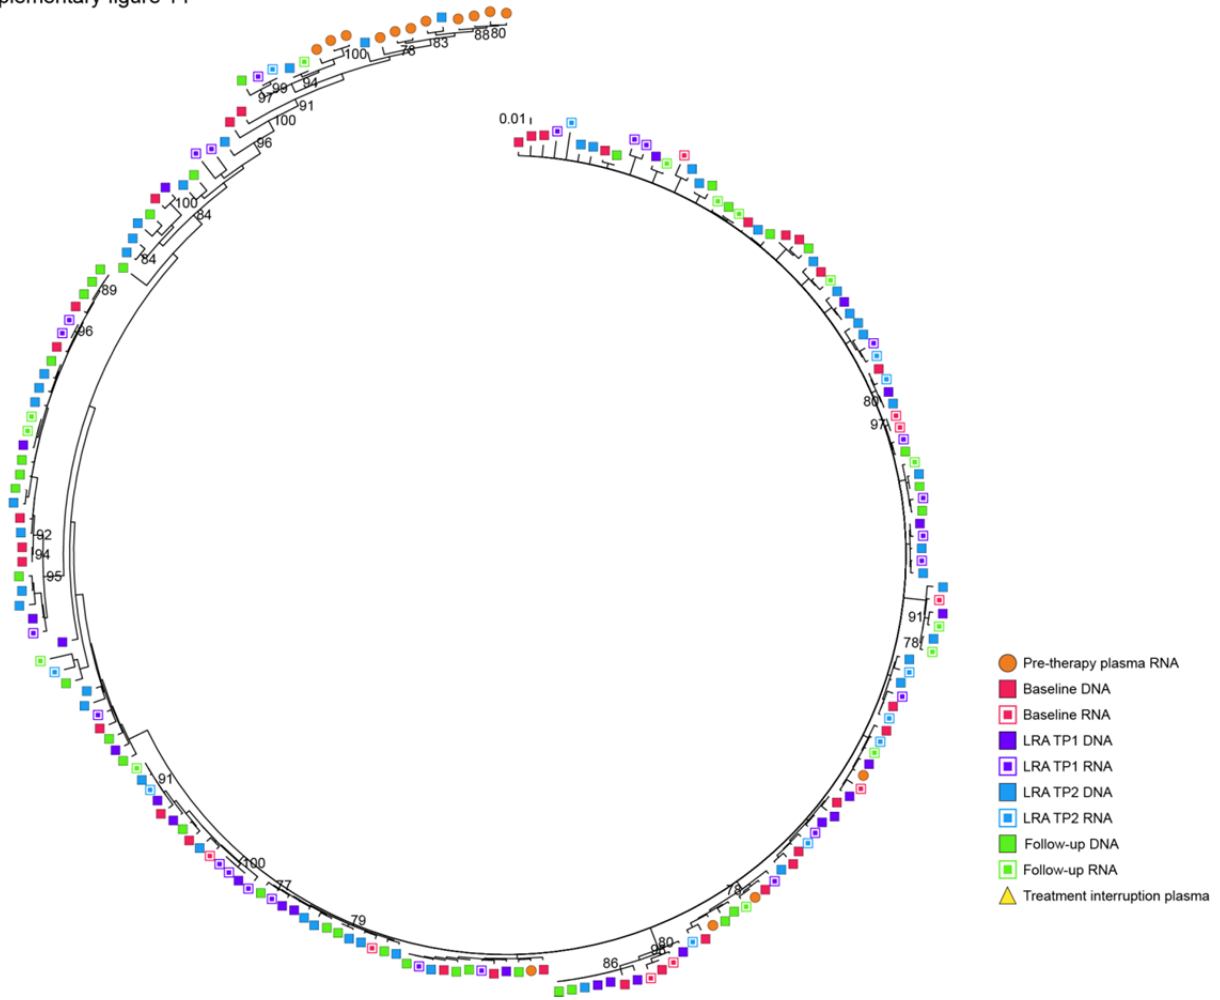

157

158 **Supplementary Figure 14** Panobinostat participant 19 phylogenetic tree. Maximum-  
 159 likelihood tree of the V1-V3 region of HIV-1 *env* sequences obtained using single-  
 160 genome sequencing on isolated CD4+ T cells for participant 19 from the panobinostat  
 161 trial. The phylogenetic analysis and tree construction were conducted using MEGA-CC.  
 162 Defective sequences (hypermutants or containing stop codons) were excluded from the  
 163 phylogenetic tree analysis. The plasma sample was collected approximately 9 months  
 164 prior to initiation of anti-retroviral therapy. Peripheral blood samples were collected at  
 165 baseline, 23 days after the first dose of panobinostat (TP1), 32 days after the first dose  
 166 of panobinostat (TP2), and 38 days after the final panobinostat dose.

## Supplementary figure 15

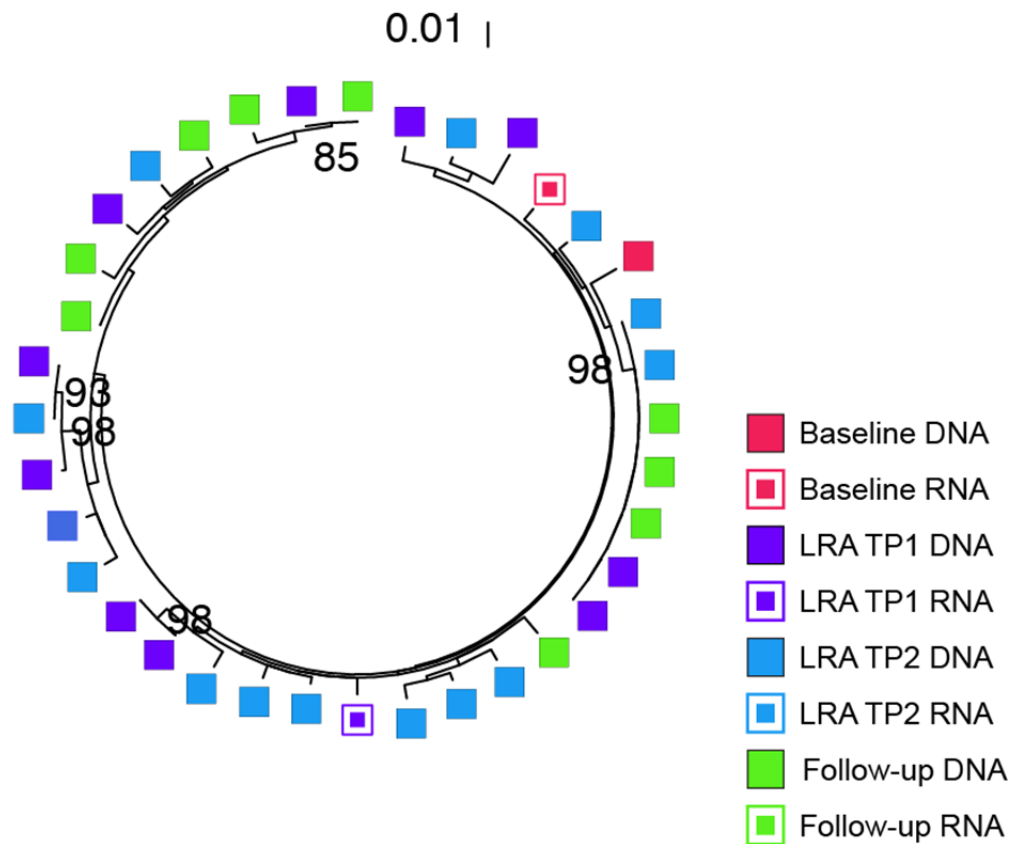

167

168 **Supplementary Figure 15** Vorinostat participant VOR001 phylogenetic tree. Maximum-  
169 likelihood tree of the V1-V3 region of HIV-1 *env* sequences obtained using single-  
170 genome sequencing on isolated CD4+ T cells for participant VOR001 from the  
171 vorinostat trial. The phylogenetic analysis and tree construction were conducted using  
172 MEGA-CC. Defective sequences (hypermutants or containing stop codons) were  
173 excluded from the phylogenetic tree analysis. Peripheral blood samples were collected  
174 at baseline, 8 hours after the first dose of vorinostat (TP1), 14 days after the first dose of  
175 vorinostat (TP2), and 7 days after the final vorinostat dose.

## Supplementary figure 16

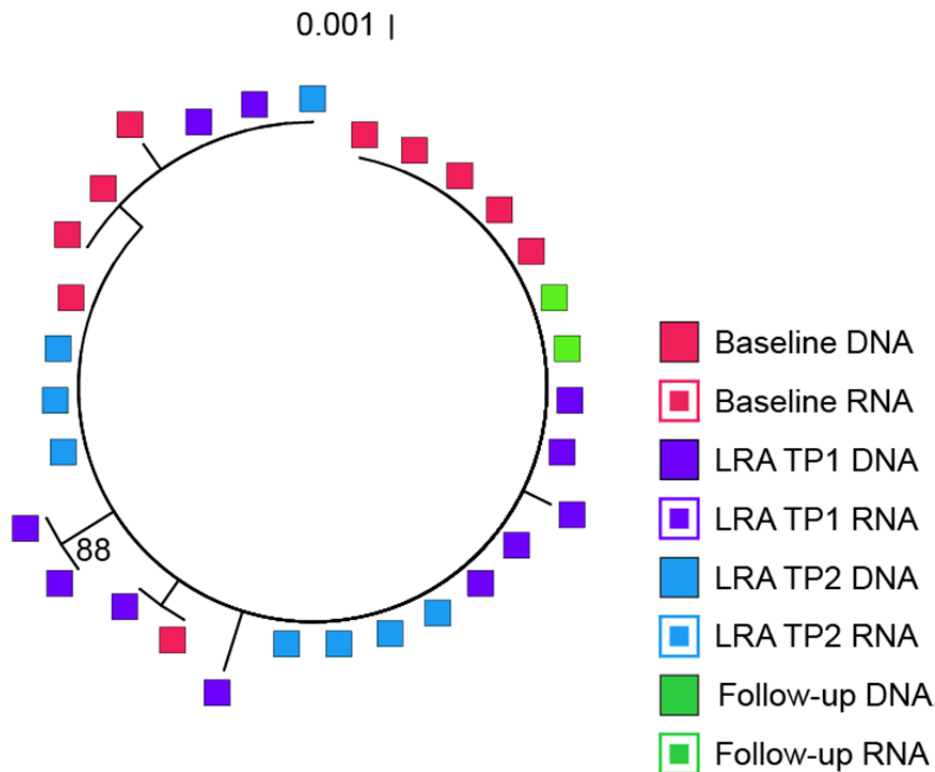

176

177 **Supplementary Figure 16** Vorinostat participant VOR002 phylogenetic tree. Maximum-  
178 likelihood tree of the V1-V3 region of HIV-1 *env* sequences obtained using single-  
179 genome sequencing on isolated CD4+ T cells for participant VOR002 from the  
180 vorinostat trial. The phylogenetic analysis and tree construction were conducted using  
181 MEGA-CC. Defective sequences (hypermutants or containing stop codons) were  
182 excluded from the phylogenetic tree analysis. Peripheral blood samples were collected  
183 at baseline, 24 hours after the first dose of vorinostat (TP1), 7 days after the first dose of  
184 vorinostat (TP2), and 7 days after the final vorinostat dose.



Supplementary figure 17

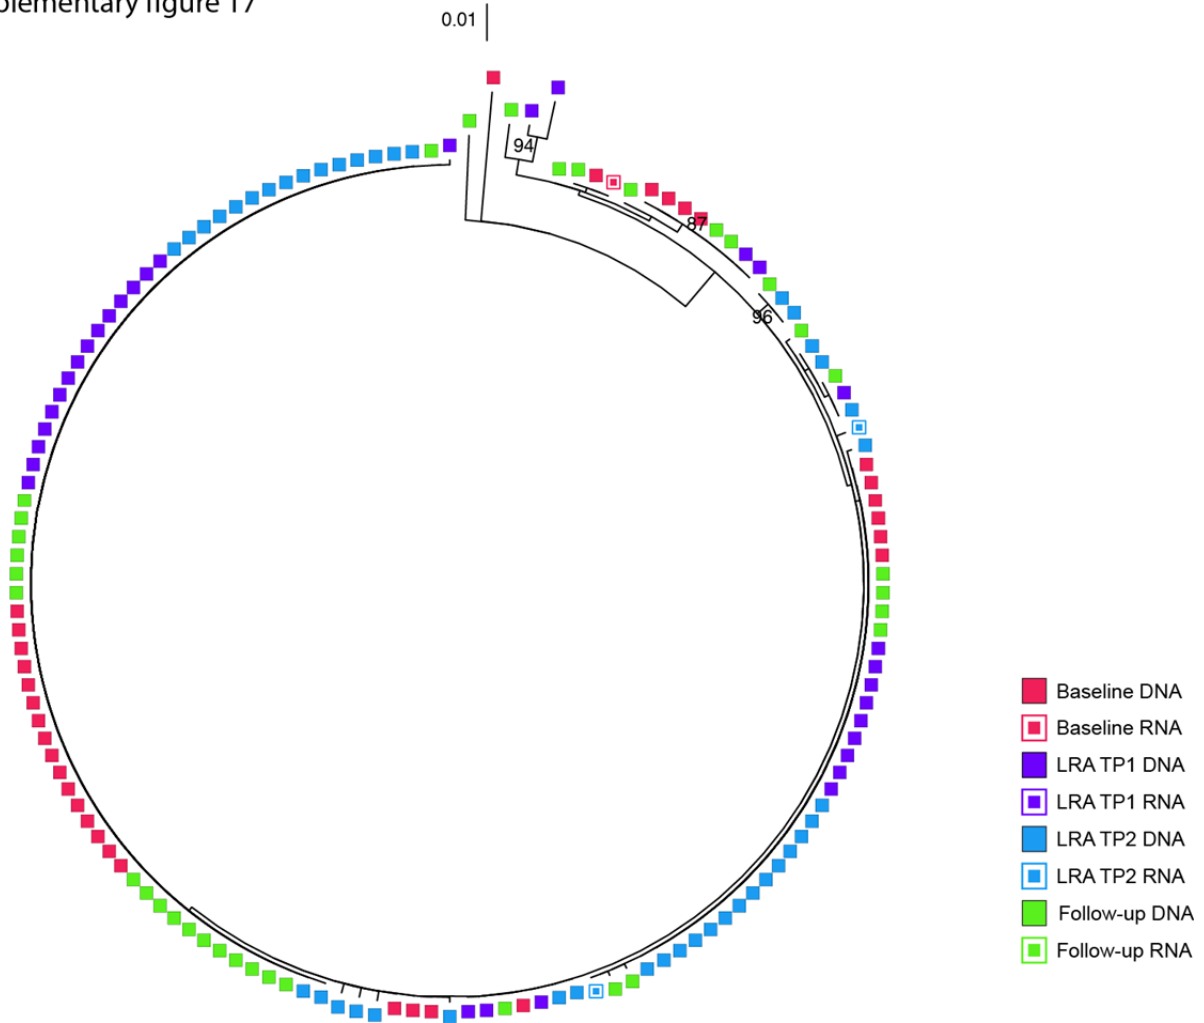

185

186 **Supplementary Figure 17** Vorinostat participant VOR003 phylogenetic tree. Maximum-  
187 likelihood tree of the V1-V3 region of HIV-1 *env* sequences obtained using single-  
188 genome sequencing on isolated CD4+ T cells for participant VOR003 from the  
189 vorinostat trial. The phylogenetic analysis and tree construction were conducted using  
190 MEGA-CC. Defective sequences (hypermutants or containing stop codons) were  
191 excluded from the phylogenetic tree analysis. Peripheral blood samples were collected  
192 at baseline, 2 hours after the first dose of vorinostat (TP1), 24 hours after the first dose  
193 of vorinostat (TP2), and 7 days after the final vorinostat dose.

Supplementary figure 18

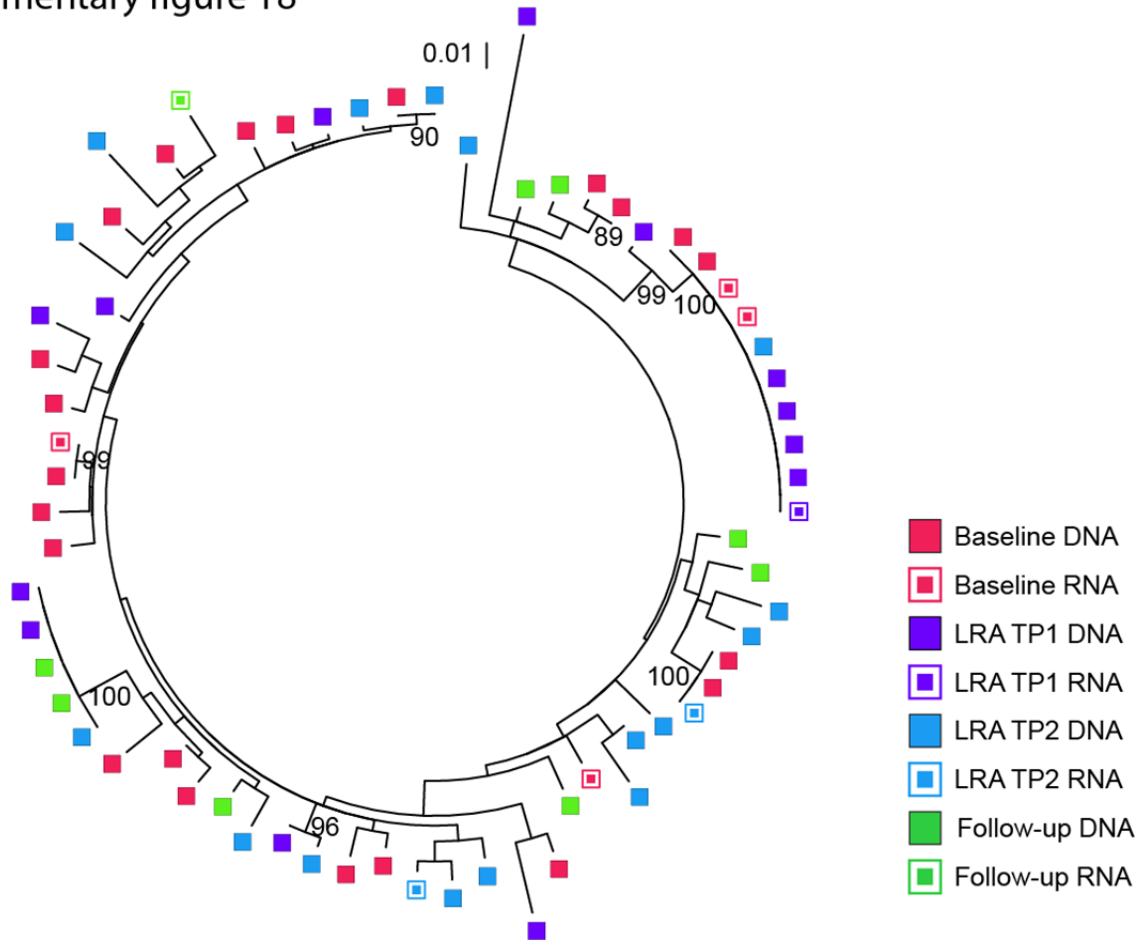

194

195 **Supplementary Figure 18** Vorinostat participant VOR006 phylogenetic tree. Maximum-  
196 likelihood tree of the V1-V3 region of HIV-1 *env* sequences obtained using single-  
197 genome sequencing on isolated CD4+ T cells for participant VOR006 from the  
198 vorinostat trial. The phylogenetic analysis and tree construction were conducted using  
199 MEGA-CC. Defective sequences (hypermutants or containing stop codons) were  
200 excluded from the phylogenetic tree analysis. Peripheral blood samples were collected  
201 at baseline, 7 days after the first dose of vorinostat (TP1), 14 days after the first dose of  
202 vorinostat (TP2), and 7 days after the final vorinostat dose.

Supplementary figure 19

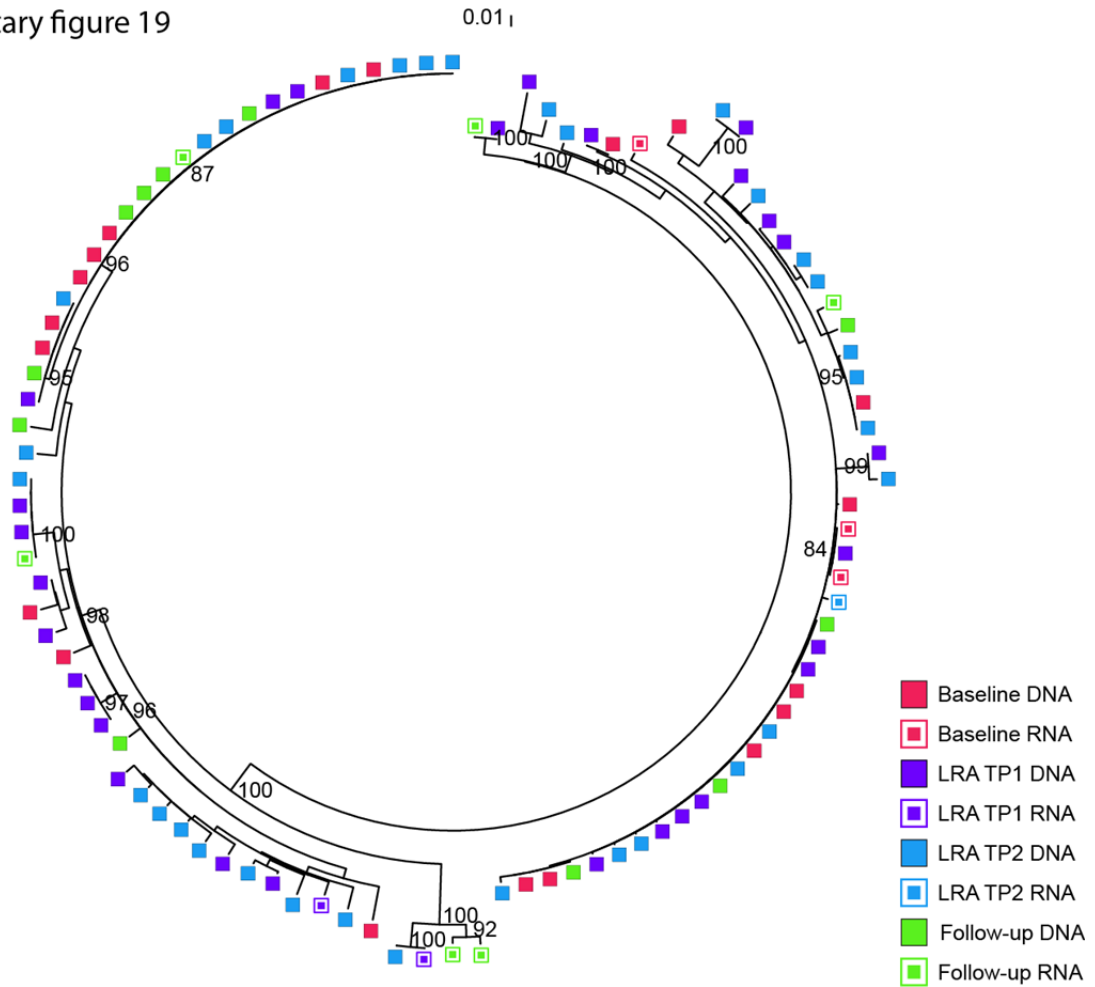

203

204 **Supplementary Figure 19** Vorinostat participant VOR009 phylogenetic tree. Maximum-  
205 likelihood tree of the V1-V3 region of HIV-1 *env* sequences obtained using single-  
206 genome sequencing on isolated CD4+ T cells for participant VOR009 from the  
207 vorinostat trial. The phylogenetic analysis and tree construction were conducted using  
208 MEGA-CC. Defective sequences (hypermutants or containing stop codons) were  
209 excluded from the phylogenetic tree analysis. Peripheral blood samples were collected  
210 at baseline, 24 hours after the first dose of vorinostat (TP1), 7 days after the first dose of  
211 vorinostat (TP2), and 7 days after the final vorinostat dose.

## Supplementary figure 20

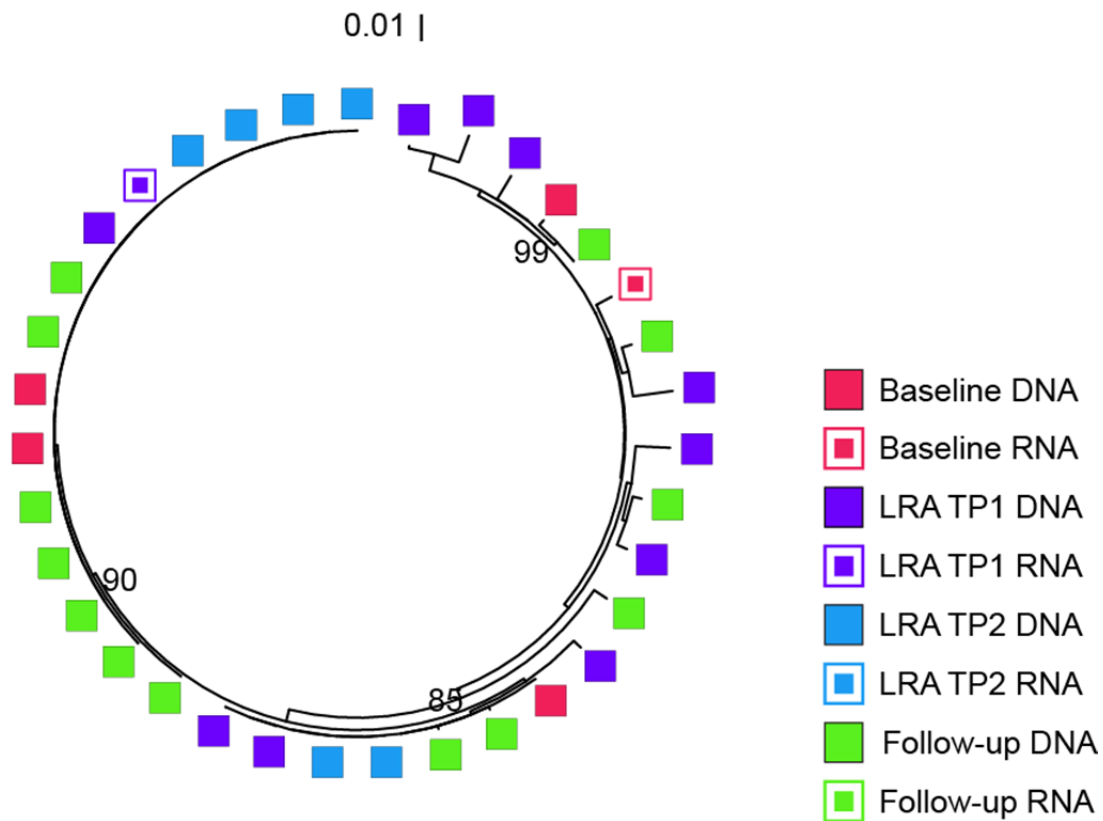

212

213 **Supplementary Figure 20** Vorinostat participant VOR011 phylogenetic tree. Maximum-  
214 likelihood tree of the V1-V3 region of HIV-1 *env* sequences obtained using single-  
215 genome sequencing on isolated CD4+ T cells for participant VOR011 from the  
216 vorinostat trial. The phylogenetic analysis and tree construction were conducted using  
217 MEGA-CC. Defective sequences (hypermutants or containing stop codons) were  
218 excluded from the phylogenetic tree analysis. Peripheral blood samples were collected  
219 at baseline, 8 hours after the first dose of vorinostat (TP1), 14 days after the first dose of  
220 vorinostat (TP2), and 7 days after the final vorinostat dose.

Supplementary figure 21

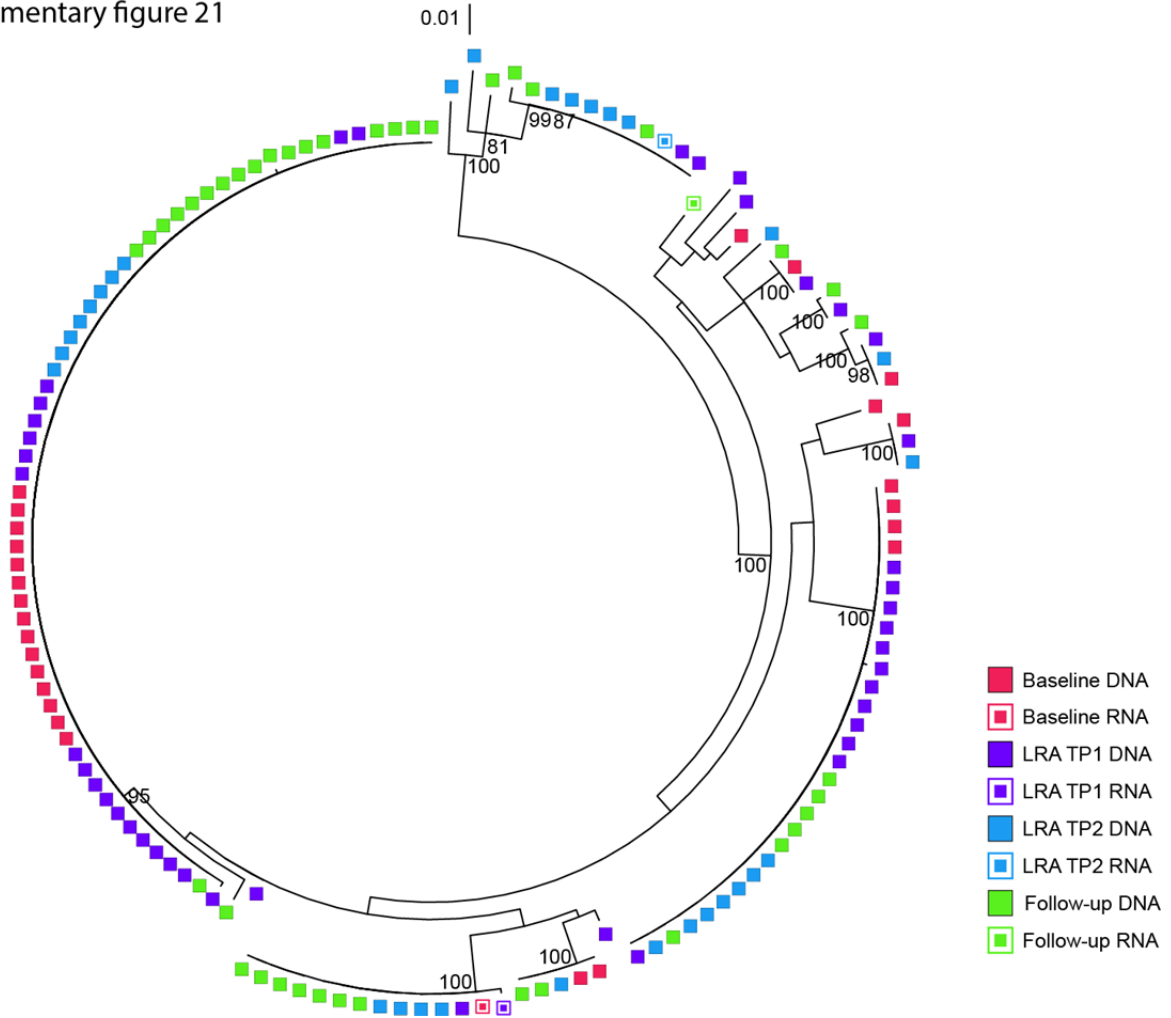

221

222 **Supplementary Figure 21** Vorinostat participant VOR013 phylogenetic tree. Maximum-  
223 likelihood tree of the V1-V3 region of HIV-1 *env* sequences obtained using single-  
224 genome sequencing on isolated CD4+ T cells for participant VOR013 from the  
225 vorinostat trial. The phylogenetic analysis and tree construction were conducted using  
226 MEGA-CC. Defective sequences (hypermutants or containing stop codons) were  
227 excluded from the phylogenetic tree analysis. Peripheral blood samples were collected  
228 at baseline, 24 hours after the first dose of vorinostat (TP1), 7 days after the first dose of  
229 vorinostat (TP2), and 7 days after the final vorinostat dose.

Supplementary figure 22

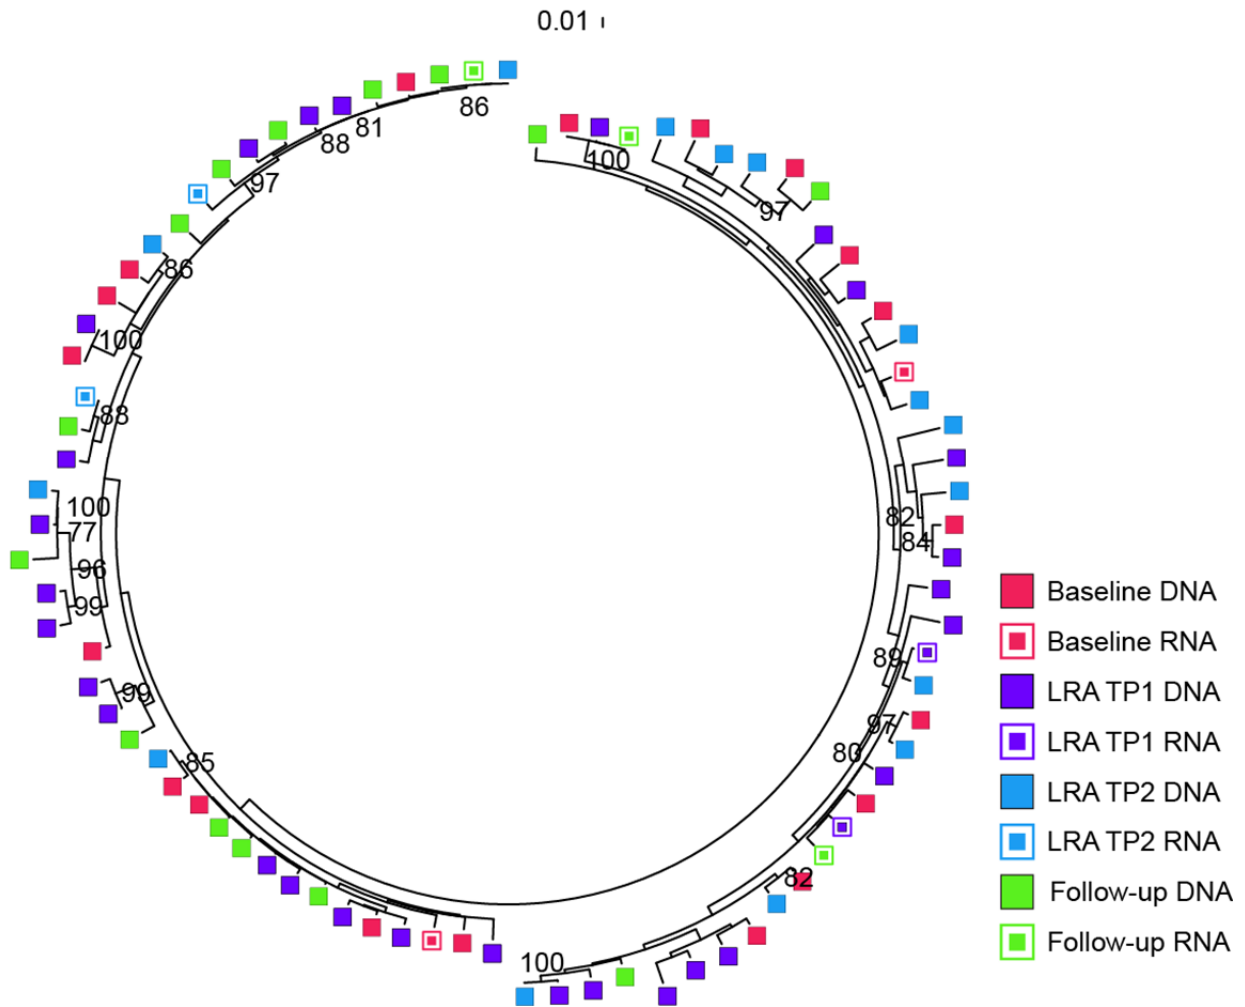

230

231 **Supplementary Figure 22** Vorinostat participant VOR014 phylogenetic tree. Maximum-  
 232 likelihood tree of the V1-V3 region of HIV-1 *env* sequences obtained using single-  
 233 genome sequencing on isolated CD4+ T cells for participant VOR014 from the  
 234 vorinostat trial. The phylogenetic analysis and tree construction were conducted using  
 235 MEGA-CC. Defective sequences (hypermutants or containing stop codons) were  
 236 excluded from the phylogenetic tree analysis. Peripheral blood samples were collected  
 237 at baseline, 24 hours after the first dose of vorinostat (TP1), 7 days after the first dose of  
 238 vorinostat (TP2), and 7 days after the final vorinostat dose.

## Supplementary figure 23

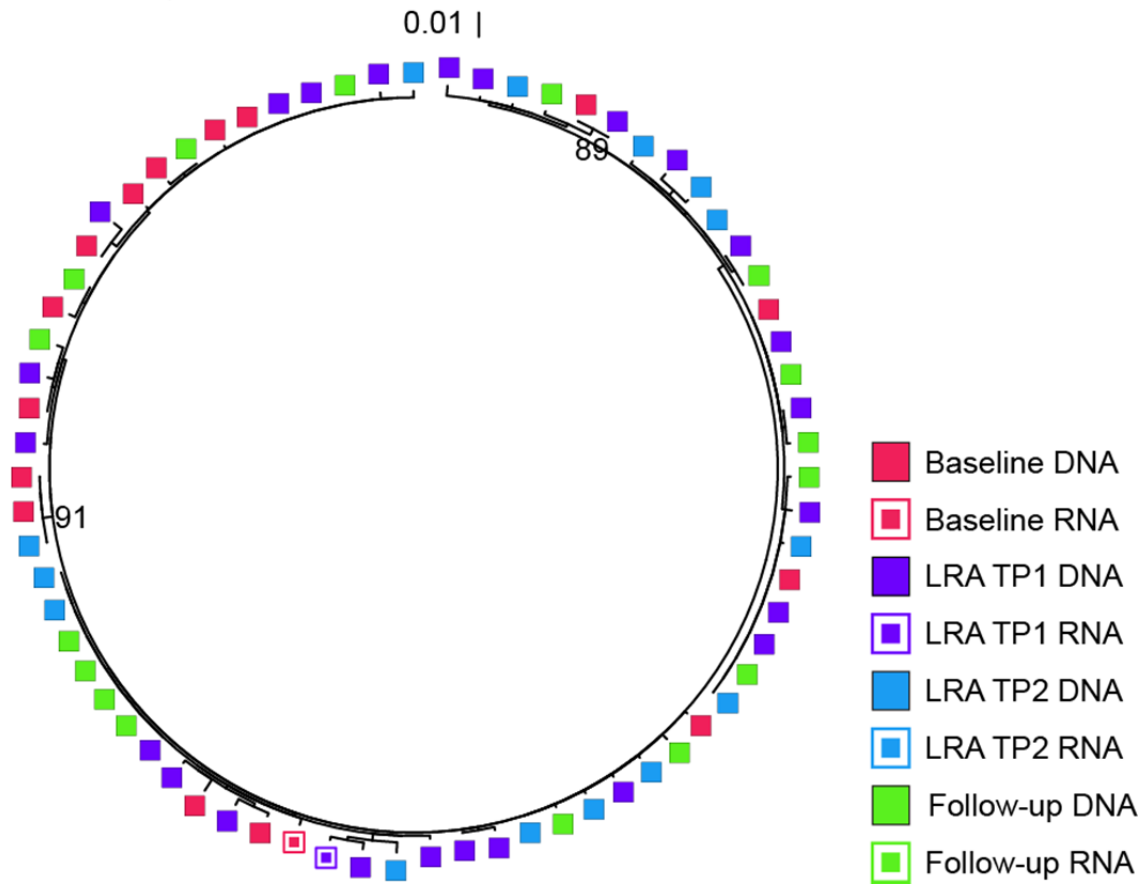

239

240 **Supplementary Figure 23** Vorinostat participant VOR015 phylogenetic tree. Maximum-  
241 likelihood tree of the V1-V3 region of HIV-1 *env* sequences obtained using single-  
242 genome sequencing on isolated CD4+ T cells for participant VOR015 from the  
243 vorinostat trial. The phylogenetic analysis and tree construction were conducted using  
244 MEGA-CC. Defective sequences (hypermutants or containing stop codons) were  
245 excluded from the phylogenetic tree analysis. Peripheral blood samples were collected  
246 at baseline, 24 hours after the first dose of vorinostat (TP1), 7 days after the first dose of  
247 vorinostat (TP2), and 7 days after the final vorinostat dose.

Supplementary figure 24

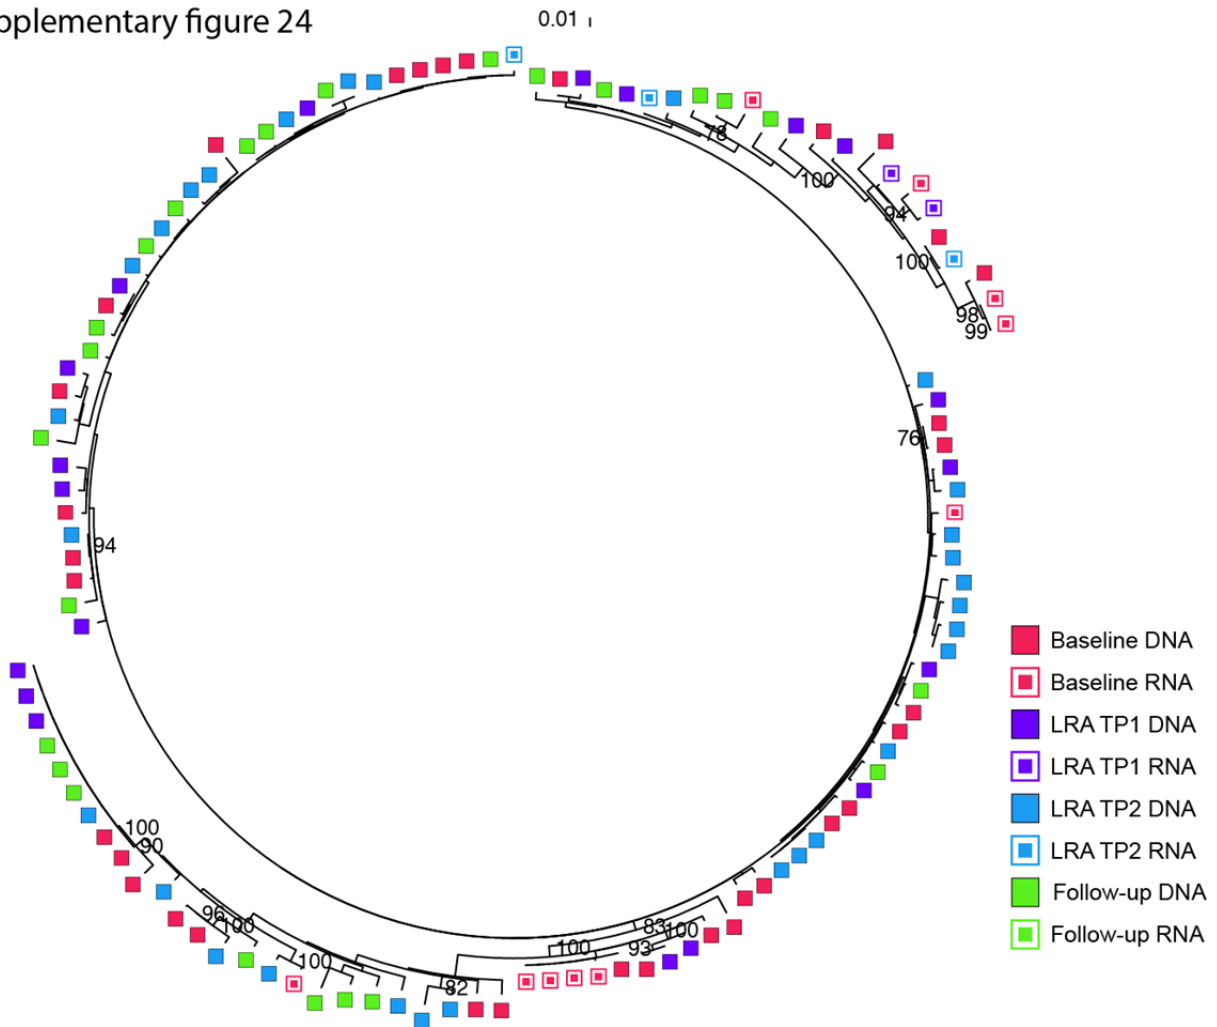

248

249 **Supplementary Figure 24** Vorinostat participant VOR018 phylogenetic tree. Maximum-  
250 likelihood tree of the V1-V3 region of HIV-1 *env* sequences obtained using single-  
251 genome sequencing on isolated CD4+ T cells for participant VOR018 from the  
252 vorinostat trial. The phylogenetic analysis and tree construction were conducted using  
253 MEGA-CC. Defective sequences (hypermutants or containing stop codons) were  
254 excluded from the phylogenetic tree analysis. Peripheral blood samples were collected  
255 at baseline, 8 hours after the first dose of vorinostat (TP1), 14 days after the first dose of  
256 vorinostat (TP2), and 7 days after the final vorinostat dose.



## Supplementary figure 25

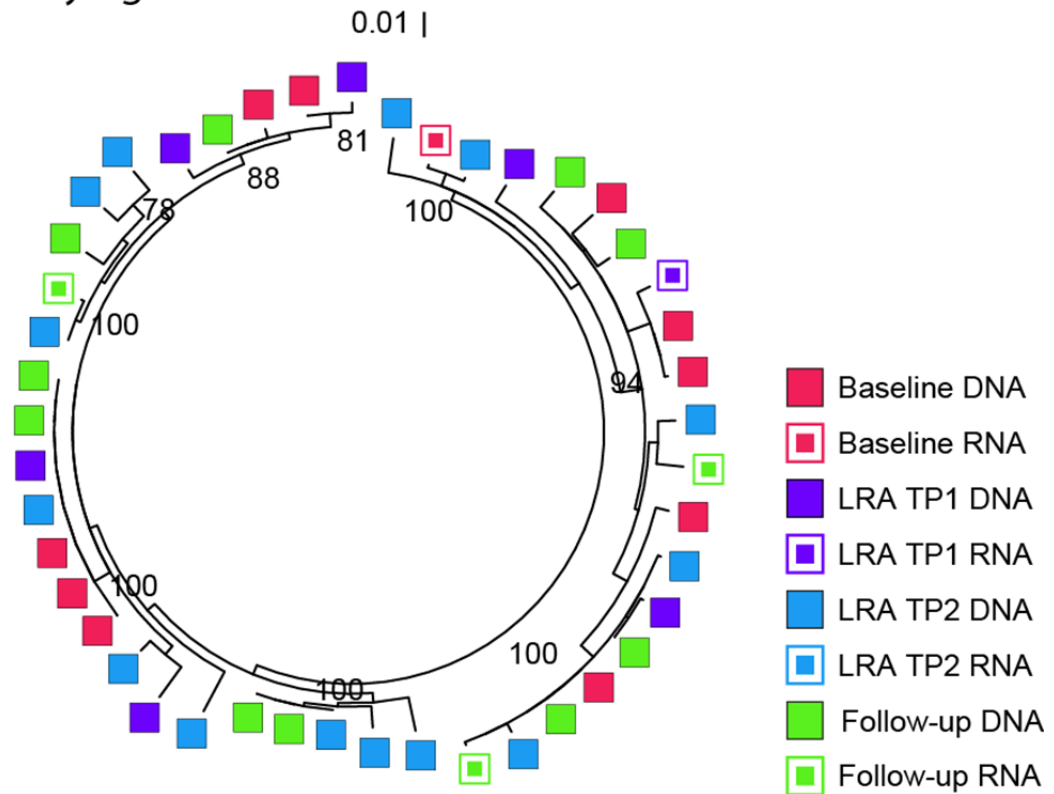

257

258 **Supplementary Figure 25** Vorinostat participant VOR019 phylogenetic tree. Maximum-  
259 likelihood tree of the V1-V3 region of HIV-1 *env* sequences obtained using single-  
260 genome sequencing on isolated CD4+ T cells for participant VOR019 from the  
261 vorinostat trial. The phylogenetic analysis and tree construction were conducted using  
262 MEGA-CC. Defective sequences (hypermutants or containing stop codons) were  
263 excluded from the phylogenetic tree analysis. Peripheral blood samples were collected  
264 at baseline, 24 hours after the first dose of vorinostat (TP1), 14 days after the first dose  
265 of vorinostat (TP2), and 7 days after the final vorinostat dose.

Supplementary figure 26

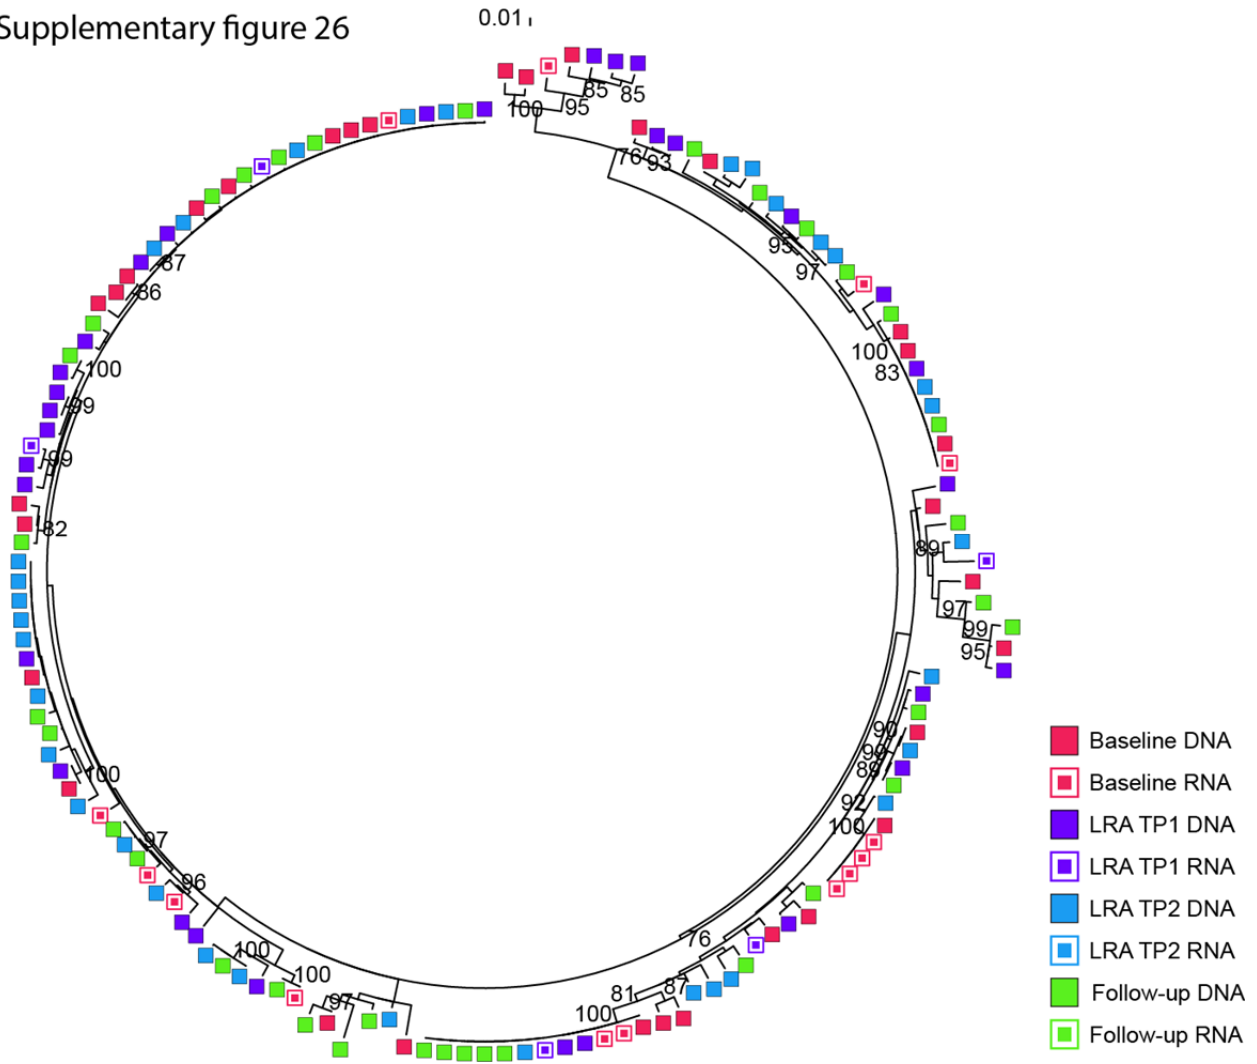

266

267 **Supplementary Figure 26** Vorinostat participant VOR020 phylogenetic tree. Maximum-  
268 likelihood tree of the V1-V3 region of HIV-1 *env* sequences obtained using single-  
269 genome sequencing on isolated CD4+ T cells for participant VOR020 from the  
270 vorinostat trial. The phylogenetic analysis and tree construction were conducted using  
271 MEGA-CC. Defective sequences (hypermutants or containing stop codons) were  
272 excluded from the phylogenetic tree analysis. Peripheral blood samples were collected  
273 at baseline, 24 hours after the first dose of vorinostat (TP1), 7 days after the first dose of  
274 vorinostat (TP2), and 7 days after the final vorinostat dose.

## Supplementary figure 27

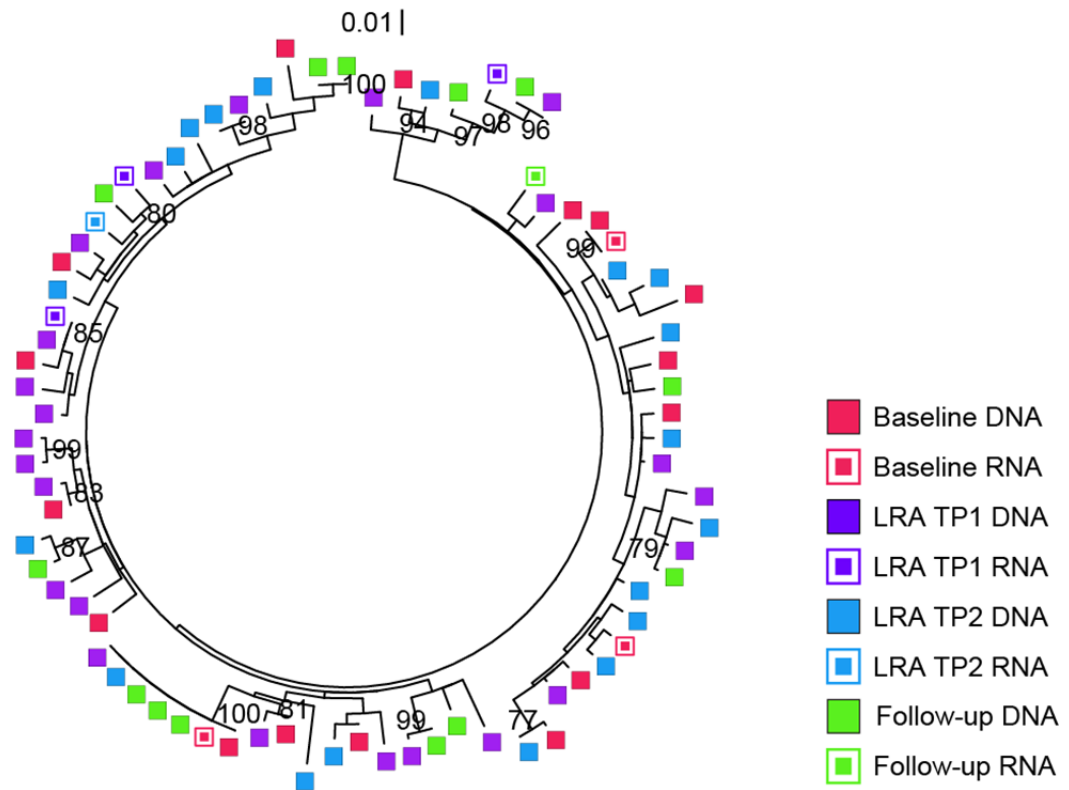

275

276 **Supplementary Figure 27** Vorinostat participant VOR022 phylogenetic tree. Maximum-  
277 likelihood tree of the V1-V3 region of HIV-1 *env* sequences obtained using single-  
278 genome sequencing on isolated CD4+ T cells for participant VOR022 from the  
279 vorinostat trial. The phylogenetic analysis and tree construction were conducted using  
280 MEGA-CC. Defective sequences (hypermutants or containing stop codons) were  
281 excluded from the phylogenetic tree analysis. Peripheral blood samples were collected  
282 at baseline, 2 hours after the first dose of vorinostat (TP1), 7 days after the first dose of  
283 vorinostat (TP2), and 7 days after the final vorinostat dose.

## Supplementary figure 28

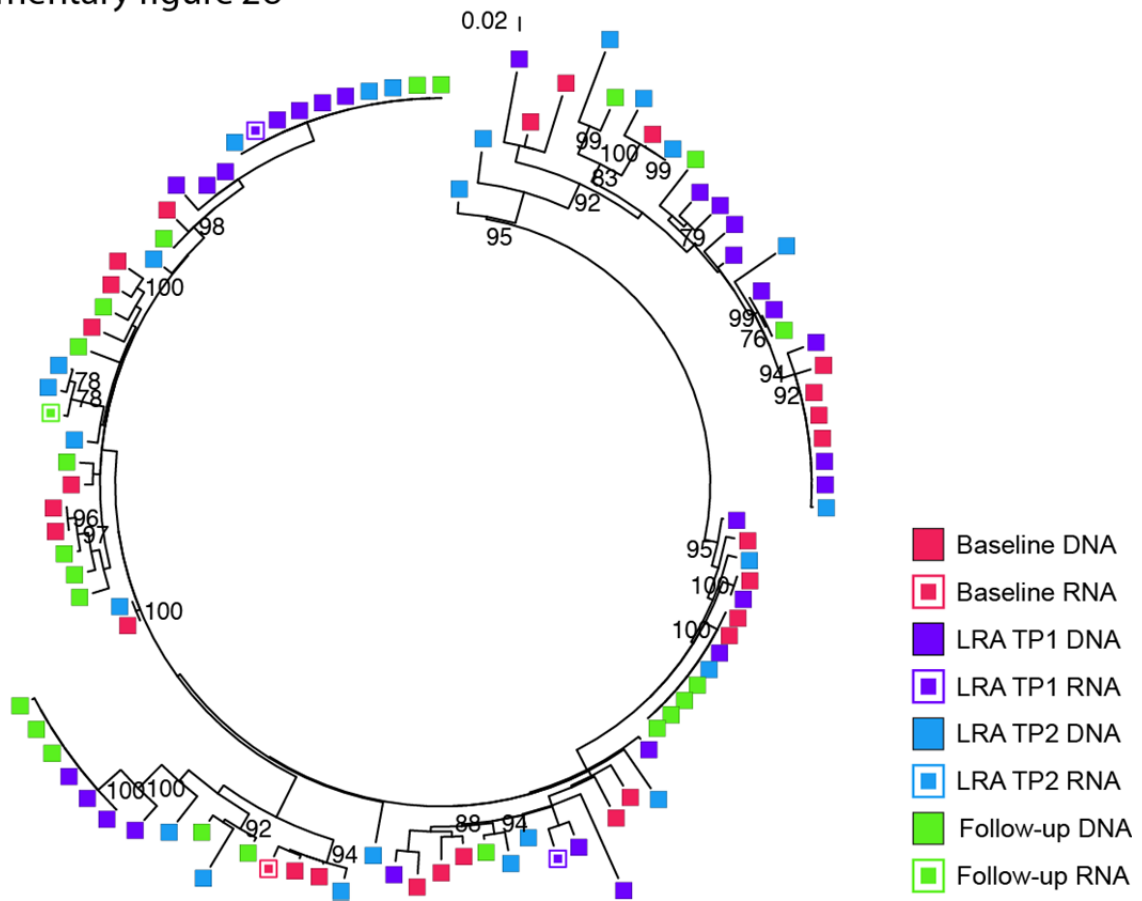

284

285 **Supplementary Figure 28** Vorinostat participant VOR023 phylogenetic tree. Maximum-  
286 likelihood tree of the V1-V3 region of HIV-1 *env* sequences obtained using single-  
287 genome sequencing on isolated CD4+ T cells for participant VOR023 from the  
288 vorinostat trial. The phylogenetic analysis and tree construction were conducted using  
289 MEGA-CC. Defective sequences (hypermutants or containing stop codons) were  
290 excluded from the phylogenetic tree analysis. Peripheral blood samples were collected  
291 at baseline, 7 days after the first dose of vorinostat (TP1), 14 days after the first dose of  
292 vorinostat (TP2), and 7 days after the final vorinostat dose.

## Supplementary figure 29

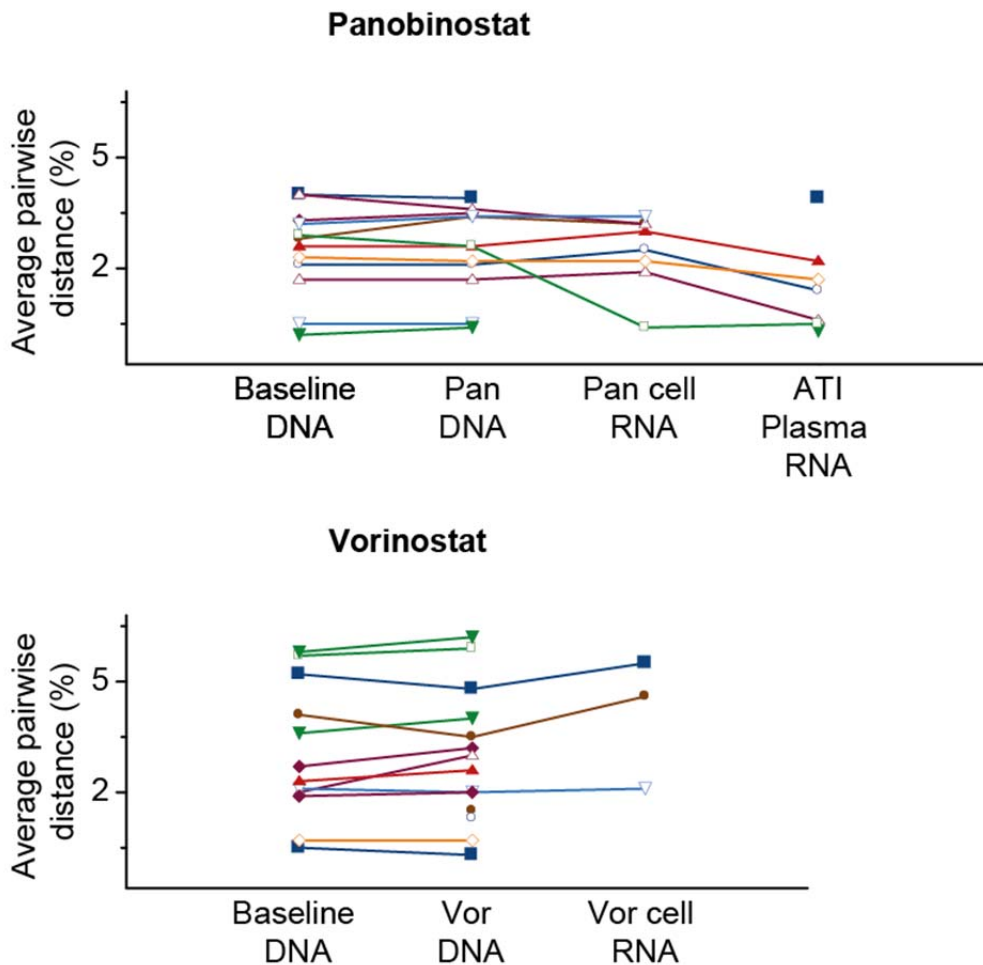

293

294 **Supplementary Figure 29** Linear mixed effects model of the average pairwise  
 295 distance. A linear mixed effect model was used to compare the average pairwise  
 296 distance (%) of the baseline DNA, on HDACi DNA, on HDAC RNA, and analytical  
 297 treatment interruption plasma RNA within each drug trial. Patient identifier was  
 298 considered as a random effect and the sample type factor as both a fixed effect and as  
 299 a random effect with a general positive definite covariance structure. In the  
 300 Panobinostat drug trial, there was a statistically significant within patient difference in  
 301 average pairwise distance (%) across the four sample types ( $p < 0.001$ ). There was no  
 302 statistically significant within patient difference between the baseline and on trial DNA  
 303 samples (mean change 0.02%, SE 0.08%,  $p = 0.741$ ), nor between the on trial DNA and  
 304 RNA samples (mean difference 0.11%, SE 0.33%,  $p = 0.748$ ). There was however a  
 305 statistically significant within patient difference between the on trial RNA measurement

306 and that following treatment interruption (mean change -0.72%, SE 0.55%,  $p=0.043$ ). In  
 307 the Vorinostat drug trial, only 3 of the 14 subjects had measurable on trial RNA values  
 308 and no RNA measurements were taken following treatment interruption. There was no  
 309 statistically significant within patient difference in average pairwise distance (%) across  
 310 the baseline or on trial sample types ( $p=0.2$ ). There was no statistically significant within  
 311 patient difference between the baseline and on trial DNA samples (mean change  
 312 0.13%, SE 0.12%,  $p=0.298$ ), nor between the on trial RNA and DNA samples (mean  
 313 difference 0.35%, SE 0.23%,  $p=0.154$ ). The linear mixed effect model was used to  
 314 generate the p values.

315

### Supplementary figure 30

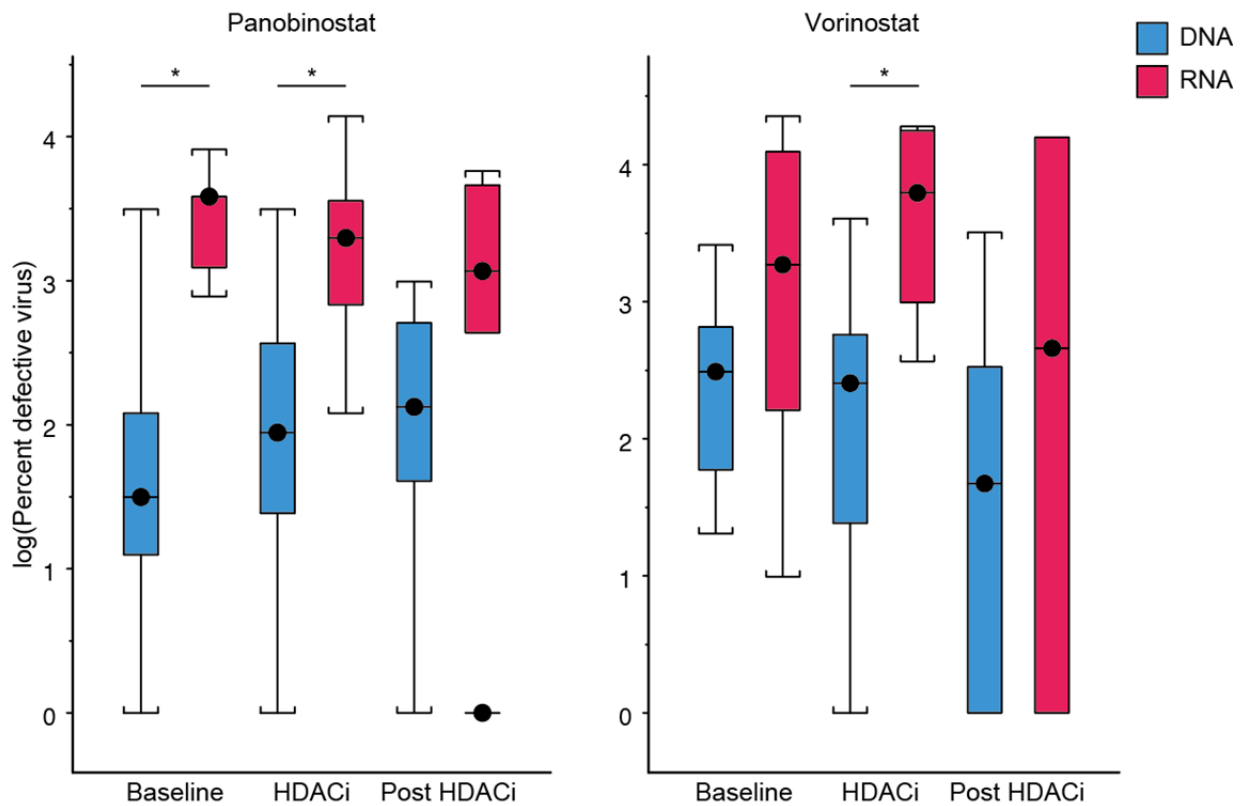

316

317 **Supplementary figure 30** Linear mixed effect model of the percent defective virus. The  
 318 percentage of defective virus was log transformed to approximate normality and to  
 319 stabilize the variance prior to analysis. Linear mixed effects models were used to  
 320 investigate the joint effects of time (treated as a 3-level factor) and type (DNA or RNA)  
 321 on log(percentage of defective virus) within each drug trial. Patient identifier, time, and

322 type were considered as random effects with a general positive definite covariance  
323 structure, and time, type, and their 2-way interaction as fixed effects. Parameter  
324 estimates and their 95% confidence intervals (95%CI) for the log(percentage of dead-  
325 end virus) analyses were back- transformed to present results using the original scale of  
326 measurement. In the Panobinostat drug trial, there was no statistically significant  
327 interaction between the within patient effects of the time factor (baseline, on trial,  
328 followup) and type (DNA, RNA) on log(percentage defective virus) ( $p=0.267$ ). The linear  
329 mixed effect model was used to generate p values.

330

### Supplementary figure 31

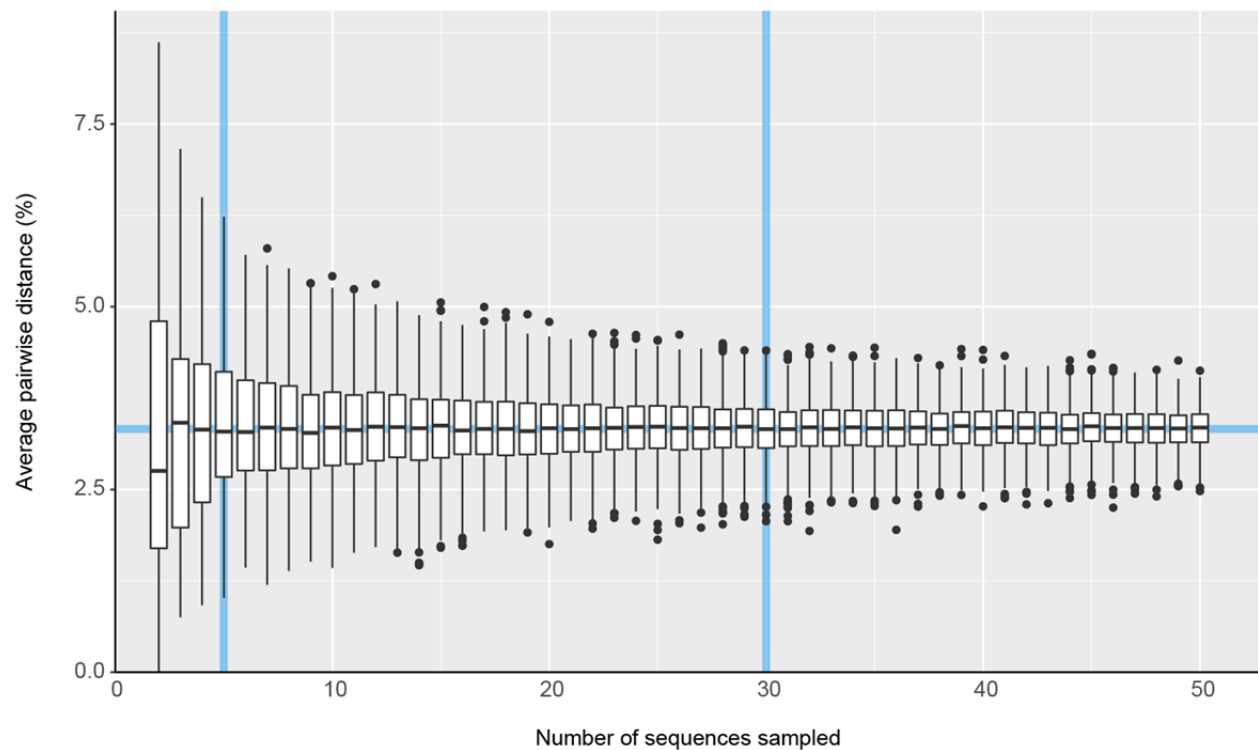

331

332 **Supplementary figure 31** Simulation of sampling for the average pairwise distances.  
333 Box plot illustrating the results of a simulation of 1,000 replicate comparisons of the  
334 average pairwise distance for 2-50 sequences. Five sequences can be used to  
335 generate an accurate measure of the average pairwise distance (mean simulation 3.345  
336 vs. actual mean 3.327, variance 1.07, 95% CI 3.281-3.410).

337

338 **Supplementary table 1** Number of intact sequences obtained for each sample for each  
 339 participant in the panobinostat trial.

| Participant | Pre-ART plasma RNA | Baseline DNA | Baseline RNA | Time point 1 DNA | Time point 1 RNA | Time point 2 DNA | Time point 2 RNA | Follow-up DNA | Follow-up RNA | Treatment Interruption plasma RNA | Baseline LPMC DNA | Baseline LPMC RNA | Week 4 LPMC DNA | Week 4 LPMC RNA | Naive | Central Memory | Effector Memory | Stem cell Memory | Terminally differentiated |
|-------------|--------------------|--------------|--------------|------------------|------------------|------------------|------------------|---------------|---------------|-----------------------------------|-------------------|-------------------|-----------------|-----------------|-------|----------------|-----------------|------------------|---------------------------|
| Pan01       | 22                 | 27           | 7            | 21               | 4                | 22               | 3                | 22            | 2             | 27                                | 26                | 0                 | 9               | 0               | 0     | 7              | 0               | 3                | 0                         |
| Pan02       | 13                 | 36           | 9            | 49               | 5                | 69               | 2                | 25            | 1             | 29                                | -                 | -                 | -               | -               | 8     | 21             | 20              | 16               | 13                        |
| Pan04       | 30                 | 27           | 1            | 17               | 0                | 4                | 0                | 5             | 0             | 13                                | -                 | -                 | -               | -               | 0     | 0              | 13              | 0                | 3                         |
| Pan05       | -                  | 0            | 0            | 7                | 0                | 3                | 0                | 5             | 0             | -                                 | 13                | 0                 | 2               | 0               | -     | -              | -               | -                | -                         |
| Pan06       | 26                 | 24           | 1            | 29               | 2                | 27               | 1                | 27            | 0             | -                                 | -                 | -                 | -               | -               | -     | -              | -               | -                | -                         |
| Pan07       | 26                 | 27           | 7            | 28               | 9                | 27               | 5                | 24            | 5             | -                                 | 21                | 0                 | 5               | 0               | -     | -              | -               | -                | -                         |
| Pan08       | -                  | 24           | 20           | 18               | 16               | 22               | 15               | 17            | 8             | 30                                | -                 | -                 | -               | -               | 0     | 26             | 15              | 0                | 0                         |
| Pan09       | -                  | 28           | 1            | 16               | 0                | 28               | 1                | 23            | 1             | 9                                 | 6                 | 0                 | 1               | 0               | 24    | 7              | 28              | 0                | 0                         |
| Pan10       | -                  | 29           | 0            | 27               | 1                | 28               | 2                | 27            | 0             | 4                                 | 29                | 0                 | 13              | 0               | 0     | 0              | 0               | 0                | 0                         |
| Pan12       | 27                 | 5            | 0            | 8                | 0                | 9                | 0                | 4             | 0             | 26                                | -                 | -                 | -               | -               | 2     | 1              | 2               | 0                | 0                         |
| Pan14       | 29                 | 4            | 0            | 4                | 1                | 3                | 0                | 5             | 0             | -                                 | 3                 | 0                 | 4               | 0               | -     | -              | -               | -                | -                         |
| Pan15       | 26                 | 36           | 3            | 24               | 11               | 16               | 6                | 41            | 6             | -                                 | 16                | 3                 | 13              | 0               | 0     | 0              | 0               | 0                | 0                         |
| Pan17       | -                  | 24           | 1            | 21               | 22               | 14               | 0                | 30            | 4             | 13                                | 8                 | 1                 | 14              | 1               | 0     | 4              | 7               | 16               | 0                         |
| Pan18       | 28                 | 28           | 7            | 27               | 15               | 29               | 18               | 28            | 6             | 24                                | 25                | 14                | 28              | 8               | -     | -              | -               | -                | -                         |
| Pan19       | 15                 | 32           | 9            | 24               | 24               | 45               | 11               | 36            | 14            | -                                 | 0                 | 0                 | 0               | 0               | -     | -              | -               | -                | -                         |

340

341 **Supplementary table 2** Number of intact sequences obtained for each sample for each  
 342 participant in the vorinostat trial as well as whether the participant began ART treatment  
 343 during acute or chronic infection.

| Participant | Acute/Chronic | Baseline DNA | Baseline RNA | Time point 1 DNA | Time point 1 RNA | Time point 2 DNA | Time point 2 RNA | Follow-up DNA | Follow-up RNA |
|-------------|---------------|--------------|--------------|------------------|------------------|------------------|------------------|---------------|---------------|
| Vor01       | C             | 1            | 1            | 10               | 1                | 13               | 1                | 9             | 0             |
| Vor02       | A             | 10           | 0            | 11               | 0                | 8                | 0                | 2             | 0             |
| Vor03       | C             | 32           | 1            | 33               | 0                | 43               | 2                | 35            | 0             |
| Vor06       | C             | 22           | 4            | 13               | 1                | 16               | 2                | 8             | 1             |
| Vor09       | C             | 19           | 3            | 28               | 2                | 32               | 1                | 11            | 6             |
| Vor11       | C             | 4            | 1            | 10               | 1                | 6                | 0                | 13            | 0             |
| Vor13       | C             | 26           | 1            | 42               | 1                | 30               | 1                | 41            | 1             |
| Vor14       | C             | 19           | 2            | 28               | 2                | 15               | 2                | 14            | 3             |
| Vor15       | C             | 15           | 1            | 24               | 1                | 14               | 0                | 16            | 0             |
| Vor16       | C             | 29           | 36           | 31               | 13               | 41               | 7                | 24            | 8             |
| Vor18       | C             | 34           | 10           | 19               | 2                | 29               | 3                | 24            | 0             |
| Vor19       | C             | 10           | 1            | 6                | 1                | 14               | 0                | 10            | 3             |
| Vor20       | C             | 32           | 14           | 31               | 5                | 33               | 0                | 35            | 0             |
| Vor22       | C             | 16           | 3            | 23               | 3                | 19               | 1                | 13            | 1             |
| Vor23       | C             | 26           | 1            | 28               | 2                | 24               | 0                | 22            | 1             |
|             | 1/14          | 295          | 79           | 337              | 35               | 337              | 20               | 277           | 24            |

344

345 **Supplementary table 3** Linear mixed effects model of the percent defective virus for  
 346 the panobinostat trial.

| Time      | RNA/DNA | Lower CI | Upper CI | p-value | n |
|-----------|---------|----------|----------|---------|---|
| Baseline  | 5.0     | 2.7      | 9.4      | 0.001   | 7 |
| On trial  | 3.6     | 1.6      | 8.0      | 0.007   | 9 |
| Follow up | 2.1     | 0.2      | 19.2     | 0.416   | 6 |

347 CI-confidence interval

348 **Supplementary table 4** Linear mixed effects model of the percent defective virus for  
 349 the vorinostat trial.

| Time      | RNA/DNA | Lower CI | Upper CI | p-value | n |
|-----------|---------|----------|----------|---------|---|
| Baseline  | 1.4     | 0.3      | 6.3      | 0.616   | 5 |
| On trial  | 3.2     | 1.3      | 8.2      | 0.024   | 6 |
| Follow up | 2.0     | 0.0      | >30      | 0.697   | 3 |

350 CI-confidence interval
